# Supplementary material for: The nasal and gut microbiome in Parkinson's disease and idiopathic rapid eye movement sleep behavior disorder
Source: PubMed Central journal article supplement (PMC5811909; doi:10.1002/mds.27105), 2017-08-26
Supplement: MDS-33-88-s001.pdf [file MDS-33-88-s001.pdf]

## **Supplementary Information:**

### **The nasal and gut microbiome in Parkinson's disease and idiopathic REM sleep behavior disorder**

Anna Heintz-Buschart, PhD,<sup>1</sup> Urvashi Pandey, MS,<sup>1</sup> Tamara Wicke,<sup>2,3</sup> Friederike Sixel-Döring, MD,<sup>2,3</sup> Annette Janzen, MD,<sup>3</sup> Elisabeth Sittig-Wiegand SN,<sup>3</sup> Claudia Trenkwalder, MD,<sup>2,4</sup> Wolfgang H Oertel, MD,<sup>3</sup> Brit Mollenhauer, MD,<sup>2,5,\$</sup> Paul Wilmes, PhD<sup>1\$\*</sup>

1 Eco-Systems Biology Research Group, Luxembourg Centre for Systems Biomedicine (LCSB), University of Luxembourg, Luxembourg.

2 Paracelsus-Elena-Klinik, Kassel, Germany.

3 Department of Neurology, Philipps University Marburg, Germany.

4 University Medical Center Goettingen, Department of Neurosurgery, Goettingen, Germany.

5 University Medical Center Goettingen, Department of Neurology, Goettingen, Germany.

\$: equal contributions

\*corresponding authors:

Dr Paul Wilmes, Eco-Systems Biology Research Group, Luxembourg Centre for Systems Biomedicine, 6, avenue des Hauts-Fourneaux, 4362 Esch-sur-Alzette, Luxembourg; +352-466644-6188; paul.wilmes@uni.lu

Dr Brit Mollenhauer, Paracelsus-Elena-Klinik, Klinikstraße 16, 34128 Kassel, Germany; +49-561-6009-200; brit.mollenhauer@paracelsus-kliniken.de

## Supplementary methods

### *qPCR quantification of bacterial and human DNA*

DNA extracted from nasal wash fluid and corresponding mock-extraction controls was amplified in duplicates, using primers targeting prokaryotes (F\_Bact1369 and R\_Prok1492)<sup>1,2</sup> and human phenylalanine-tRNA-synthase (PHA\_Syn5-FWD\_AAGCCCAACGATGATCAAAT; PHA\_Syn5-REV\_CAGGGGACTGTCATACACCA) using iQ SYBR Green Supermix (Bio-Rad Laboratories) on a LightCycler 480 (Roche Diagnostics, Germany). Absolute DNA copy numbers were calculated using standards of genomic DNA from *Salmonella typhimurium* LT2 and human cells (Caco-2) as described.<sup>1,2</sup>

### *16S and 18S rRNA gene amplicon sequencing*

The V4 region of the 16S rRNA gene was amplified by using primers 515F<sup>3</sup> and 805R.<sup>4</sup> For the nasal wash-derived DNA and control samples, 30 amplification cycles were employed instead of 25 (applied for the stool-derived DNA) and the amplicon copy number was determined by qPCR and isomolecular mixtures of the libraries were prepared for the sequencing runs. The V4 region of the 18S rRNA gene was amplified from the DNA extracted from the stool samples only, by using primers 574\*F and 1132R targeting microeukaryotes.<sup>5</sup> Sequencing with 2 x 300 nt was performed using the V3 MiSeq kit on a MiSeq platform (Illumina). Amplification and sequencing was performed by the Groupe Interdisciplinaire de Génoprotéomique Appliquée (GIGA; Liège, Belgium). All sequencing data is accessible under NCBI Bioproject PRJNA381395.

### *Amplicon sequence data processing*

Raw de-multiplexed sequencing reads from 16S rRNA gene amplicon sequencing were processed using LotuS v1.47,<sup>6</sup> including taxonomic assignment using the Ribosomal Database Project (RDP) classifier. Further analysis and filtering was performed in R.<sup>7</sup> Operational taxonomic units (OTUs) with reference sequences which could not be assigned at the domain level with a confidence > 0.8 were discarded. In addition to the stool and nasal wash samples, 57 extraction controls, internal standards and replicate samples were analyzed. OTUs that were uncommon (represented by less than 10 reads in all samples) or attributable (by the RDP classifier or blastn) to genomes of non-target organisms (such as human, mitochondria, plants and chloroplast) or reagent contaminants were removed. To detect sequences likely originating from reagent contaminants, sequencing controls without input (“no-template”) were first analyzed. A single OTU (genus *Alcaligenes*) present in all no-template-controls was removed from the dataset. In a second step, OTUs over-represented in the no-template controls (defined by being represented by more than 10 times the relative number of reads in the no-template datasets compared to the average sample-derived datasets from the same sequencing batch) were removed from the whole dataset. In a third step, OTUs over-represented in any of the mock-extraction controls were removed from the whole dataset. Replicate datasets from the same nasal wash samples were added up for further analysis, while for replicate datasets of the stool samples, only the replicate with the highest number of reads was retained. Good’s coverage estimates were used to determine the numbers of reads required to represent 99 % of the communities in all nasal wash and stool samples (1,711 and 3,527 respectively). Reads were aggregated at higher taxonomic levels for confidently assigned OTUs.

Raw de-multiplexed sequencing reads from 18S rRNA gene amplicon sequencing were processed as described earlier,<sup>8</sup> including taxonomic assignment using the PR2 database.<sup>9</sup> OTUs classified as Metazoa or Streptophyta were removed. OTUs that could not be classified confidently were blasted against the NCBI-NR database. OTUs with significant alignments to mammalian, plant or bacteria genomes were manually removed. Rare OTUs and those likely stemming from a sequencing contaminant were removed analogous to the description above. 15 samples that did not meet the number of reads required to represent 99 % of the community based on Good's coverage estimates (4,414) were likewise removed from the final dataset. Samples of 9 individuals were withheld from the statistical analysis because they did not meet inclusion criteria for PD or RBD.

#### *Metagenomic sequencing and analysis*

Whole metagenome shotgun sequencing was performed on libraries prepared from 500 ng DNA on a HiSeq2500 (Illumina) using HiSeq V3 reagents. Metagenomic sequencing was conducted at GATC Biotech AG (Germany).

Metagenomic reads were trimmed, human reads were removed and preprocessed reads were assembled using the integrated metaomic pipeline IMP.<sup>10</sup> The sequencing data is accessible under NCBI Bioproject PRJNA381395. Functional annotations of the genes were achieved using HMMer3.0<sup>11</sup> and hidden Markov models from an in-house collections<sup>12</sup> and for Curli genes.<sup>13</sup> rRNA genes were predicted using Barrnap. Depths of coverage of contigs were calculated within IMP. Contigs were binned according to pentamer frequencies and depth of coverage as described previously.<sup>12</sup> One bin was manually refined based on depth of coverage.

*Linking of metagenomic genome reconstructions to 16S rRNA amplicon-based OTUs, published taxonomies and metagenomic species*

Metagenomic 16S sequences were clustered with OTU-representative amplicon sequences using CD-HIT-EST-2D.<sup>14</sup> In addition, metagenomic reads were mapped against OTU-representative amplicon sequences using Bowtie2<sup>15</sup> and contigs mapped by the other partner of a read mapping to an OTU sequence were extracted using picard. Further taxonomic information of reconstructed genomes were obtained by calling phylogenetic marker genes using fetchMG<sup>16,17</sup> and the mOTU taxonomy<sup>18</sup> as described previously.<sup>12</sup> For bins associated with metagenomic linkage groups without a classification at the phylum level, published metagenomic species<sup>19</sup> with close similarity to the bins of unknown taxonomy were searched using the NCBI's blastp web application. Further functional analyses were performed in RAST,<sup>20</sup> as described<sup>21</sup> including comparing one reconstructed genome to the published MelB1 genome<sup>22</sup> and searching genes with similarity to Anatoxin<sup>23,24</sup> or Saxitoxin<sup>25</sup> biosynthesis genes (genome accessions 6666666.250140 and 6666666.250141).

## Results of the differential analysis of the nasal microbiota

### Summarized results of the differential analyses of the nasal microbiota at the family level.

| taxon                                | HC               | PD vs HC                     |              | iRBD vs HC                   |              |
|--------------------------------------|------------------|------------------------------|--------------|------------------------------|--------------|
|                                      | mean % abundance | log <sub>2</sub> fold change | adj. P value | log <sub>2</sub> fold change | adj. P value |
| Listeriaceae                         | 0.03             | -5.72                        | 0.046        | -7.41                        | 0.443        |
| Bacillaceae 1                        | 0.99             | -2.94                        | 0.022        | -1.68                        | 0.959        |
| Ruminococcaceae                      | 0.73             | -2.68                        | 0.031        |                              |              |
| Micrococcaceae                       | 1.03             | -2.62                        | 0.031        | -0.85                        | 0.959        |
| Carnobacteriaceae                    | 0.16             | 2.06                         | 0.046        | -2.60                        | 0.794        |
| Hydrogenophilaceae                   | 0.01             | 4.34                         | 0.046        |                              |              |
| Hyphomicrobiaceae                    | 0.07             | 6.95                         | 5.86E-05     |                              |              |
| Desulfovibrionaceae                  | 0.04             | -7.46                        | 0.046        | -23.30                       | 0.001        |
| Bacillales <i>incertae sedis</i> XII | 0.29             | -3.45                        | 0.415        | -21.46                       | 0.001        |
| Oxalobacteraceae                     | 0.02             | -1.29                        | 0.516        | -8.54                        | 0.045        |

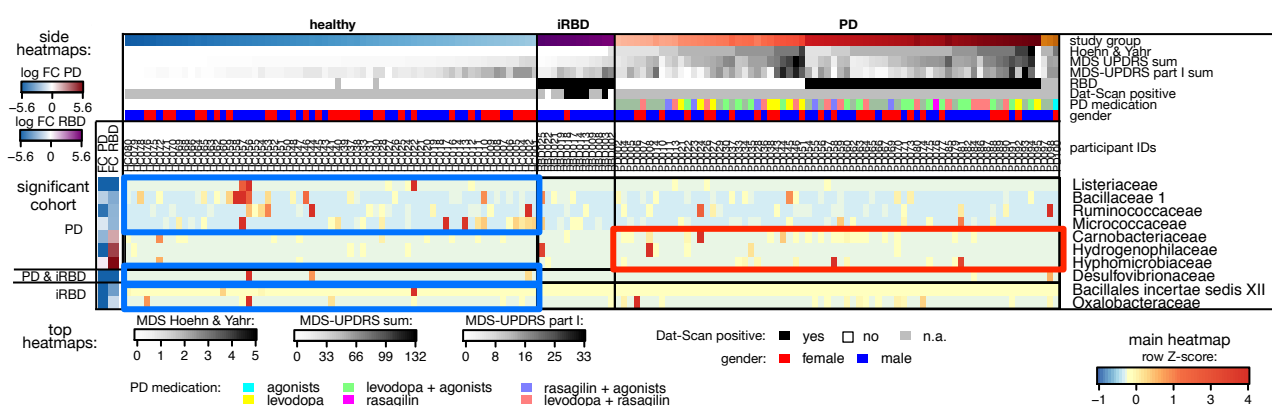

**Heatmap:** Relative abundances of bacterial families of the nasal microbiota that were found to be differentially abundant in either PD patients or iRBD patients or both compared to the healthy controls (FDR-adjusted P-values < 0.05). Legends for the cohort-related indications at the top, the summarizing heatmaps to the left and for the central heatmap are given to the left and below the heatmap.

## Results of the differential analysis of the gut microbiota

### Explanation of heatmaps with differentially abundant taxa, eg. Figure 2A:

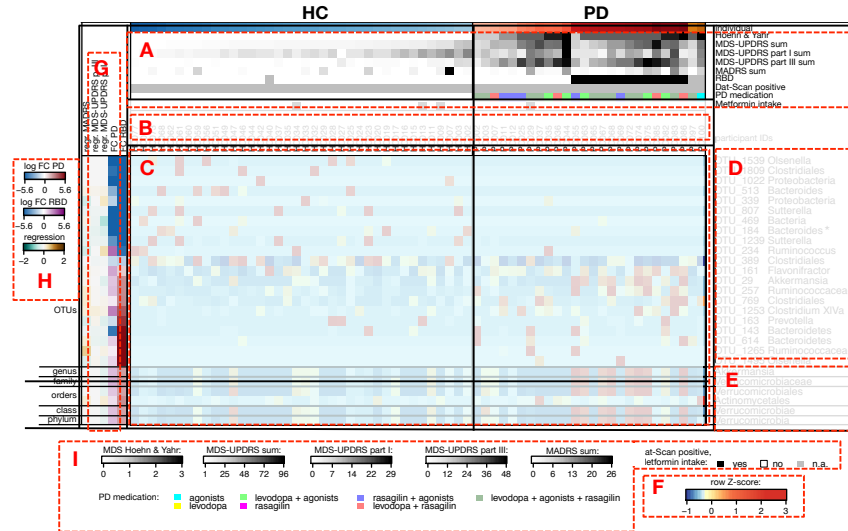

- A. Color-coded representation of subject information: study group, staging, motor and non-motor symptoms, medication etc. (legends in I).
- B. Subject identifiers.
- C. Heatmap of microbial abundances. Each field represents the abundance of one microbial taxon in a given study subject's microbiome compared to the abundance of this taxon in all analyzed samples (color bar in F). The taxa were selected based on their differential abundance in PD patients compared to healthy controls (different taxonomic levels are delineated by a black line).
- D. Names of differentially abundant operational taxonomic units (OTUs) and the lowest taxonomic classification of each OTU.
- E. Names of differentially abundant taxa at genus, family, order, class or phylum level.
- F. Color bar legend for the heatmap (C). Abundances are represented relative to the mean and standard deviation of the abundances of each taxon in the analyzed samples (Z-score of 1 is one standard deviation away from the mean). Taxa with a higher than average representation in an individual's microbiome are labeled in red, taxa with a lower than average representation are labeled in blue.
- G. Heatmaps representing summarized measures of the taxon abundances. From right to left:  $\log_2$  fold change between PD patients and healthy controls,  $\log_2$  fold change between iRBD patients and healthy controls, unit by unit regression of taxon abundance to non-motor symptoms (MDS-UPDRS I), motor symptoms (MDS-UPDRS III) and depression (MADRS) in the PD patients (color bars in H).
- H. Color bar legends of the heatmaps in G.
- I. Color bars and legends for subject-related information represented in A.

#### Example (OTU\_749, of genus *Anaerotruncus*):

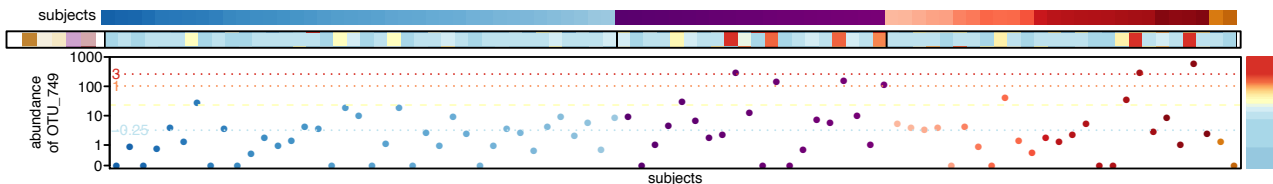

## Visualizations of the distributions of the relative abundances of the differential taxa

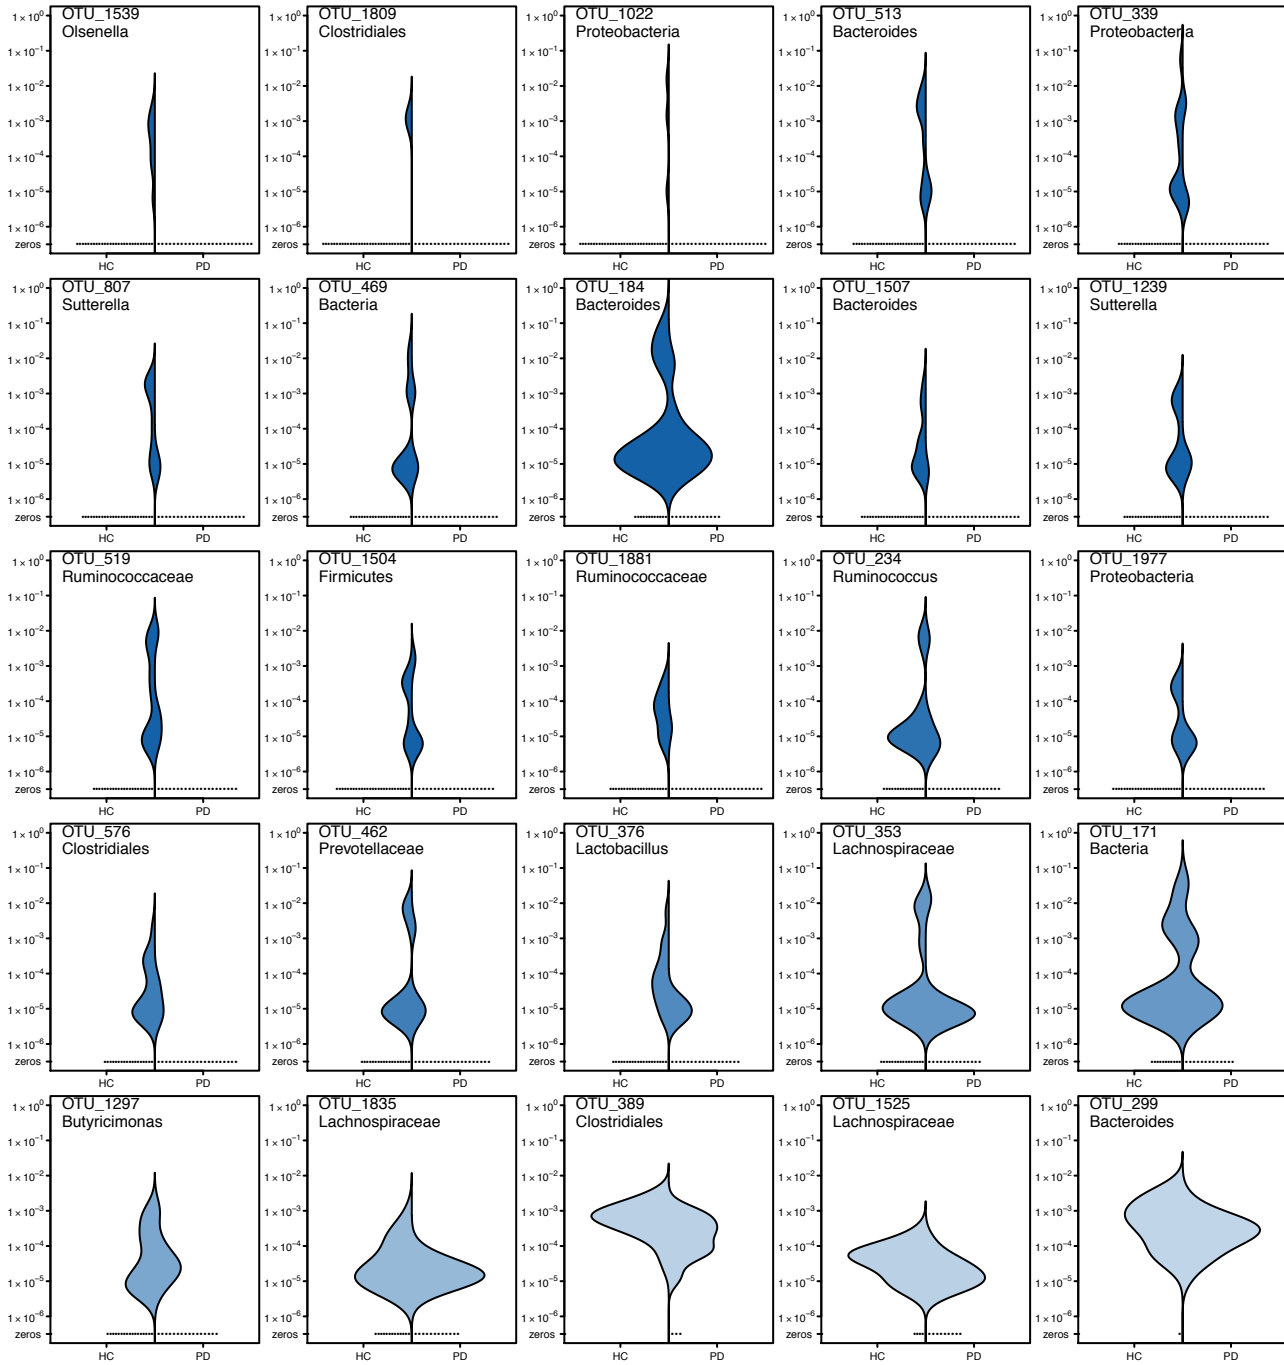

**Histograms (part 1):** Distributions of the relative abundances of bacterial OTUs in the gut microbiota that were found to be differentially abundant in PD patients compared to the healthy controls (FDR-adjusted P-values < 0.05). Relative abundances are estimated from sum-normalized rarefied data; only values for individuals without type 2 diabetes are shown; left: HC, right: PD.



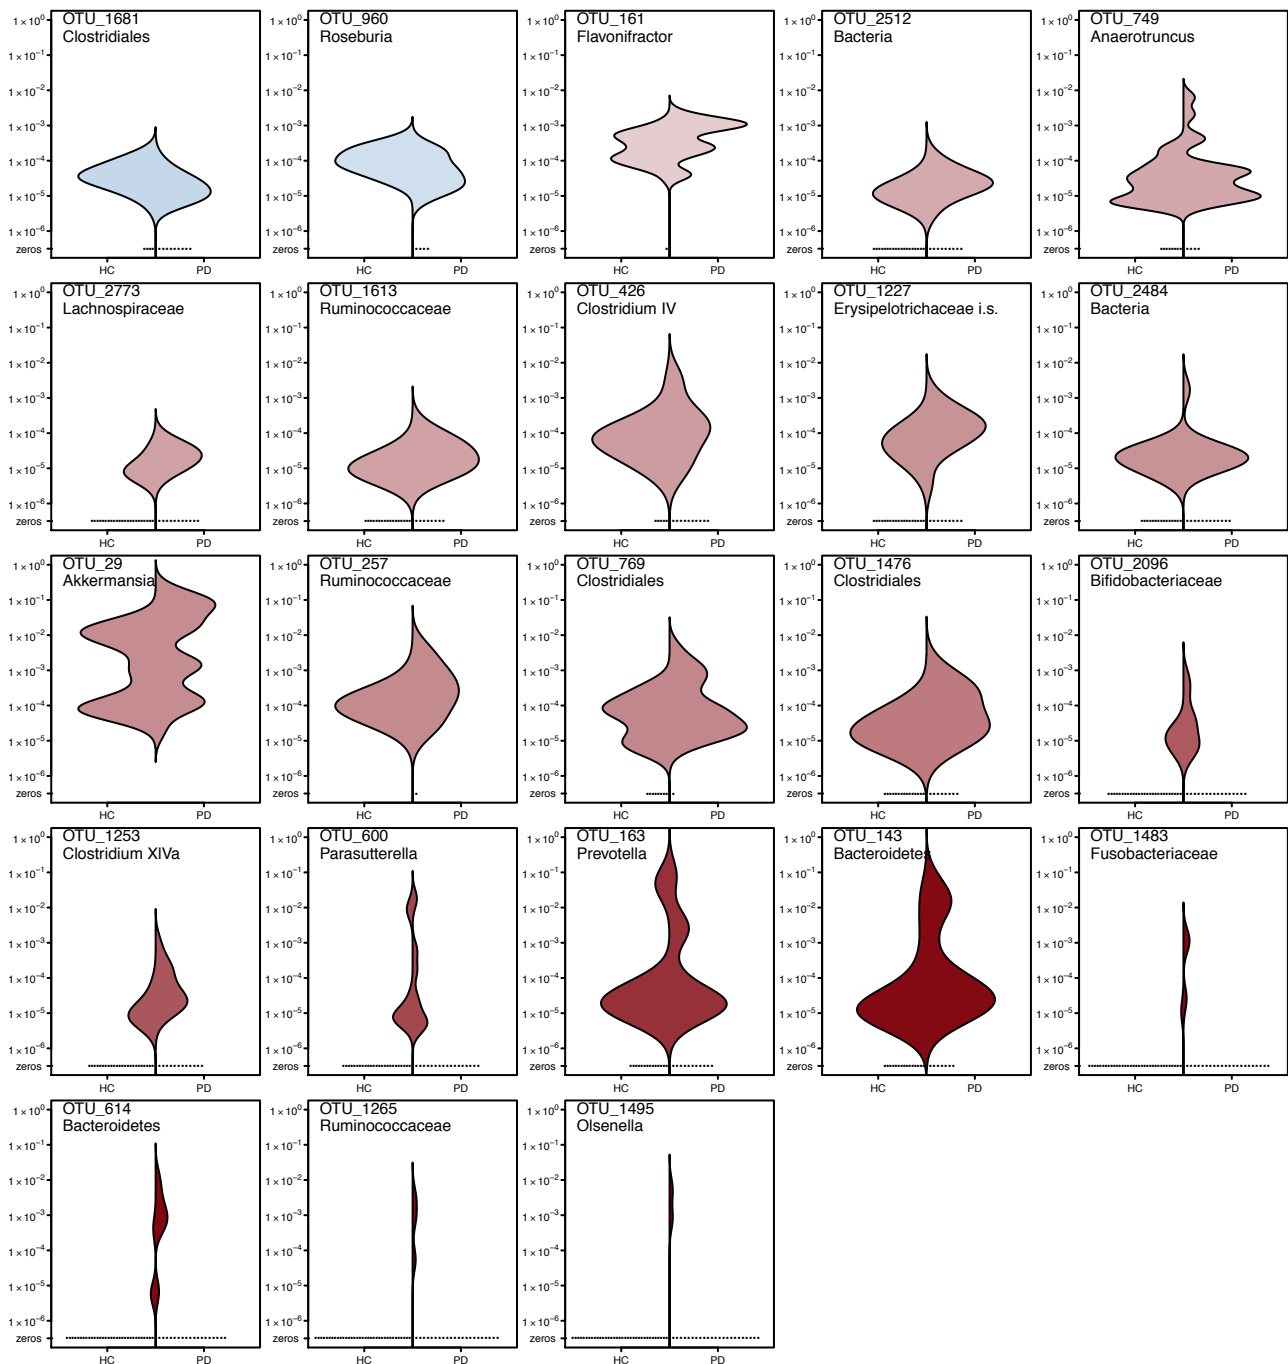

**Histograms (part 2):** Distributions of the relative abundances of bacterial OTUs in the gut microbiota that were found to be differentially abundant in PD patients compared to the healthy controls (FDR-adjusted P-values < 0.05). Relative abundances are estimated from sum-normalized rarefied data; only values for individuals without type 2 diabetes are shown; left: HC, right: PD.

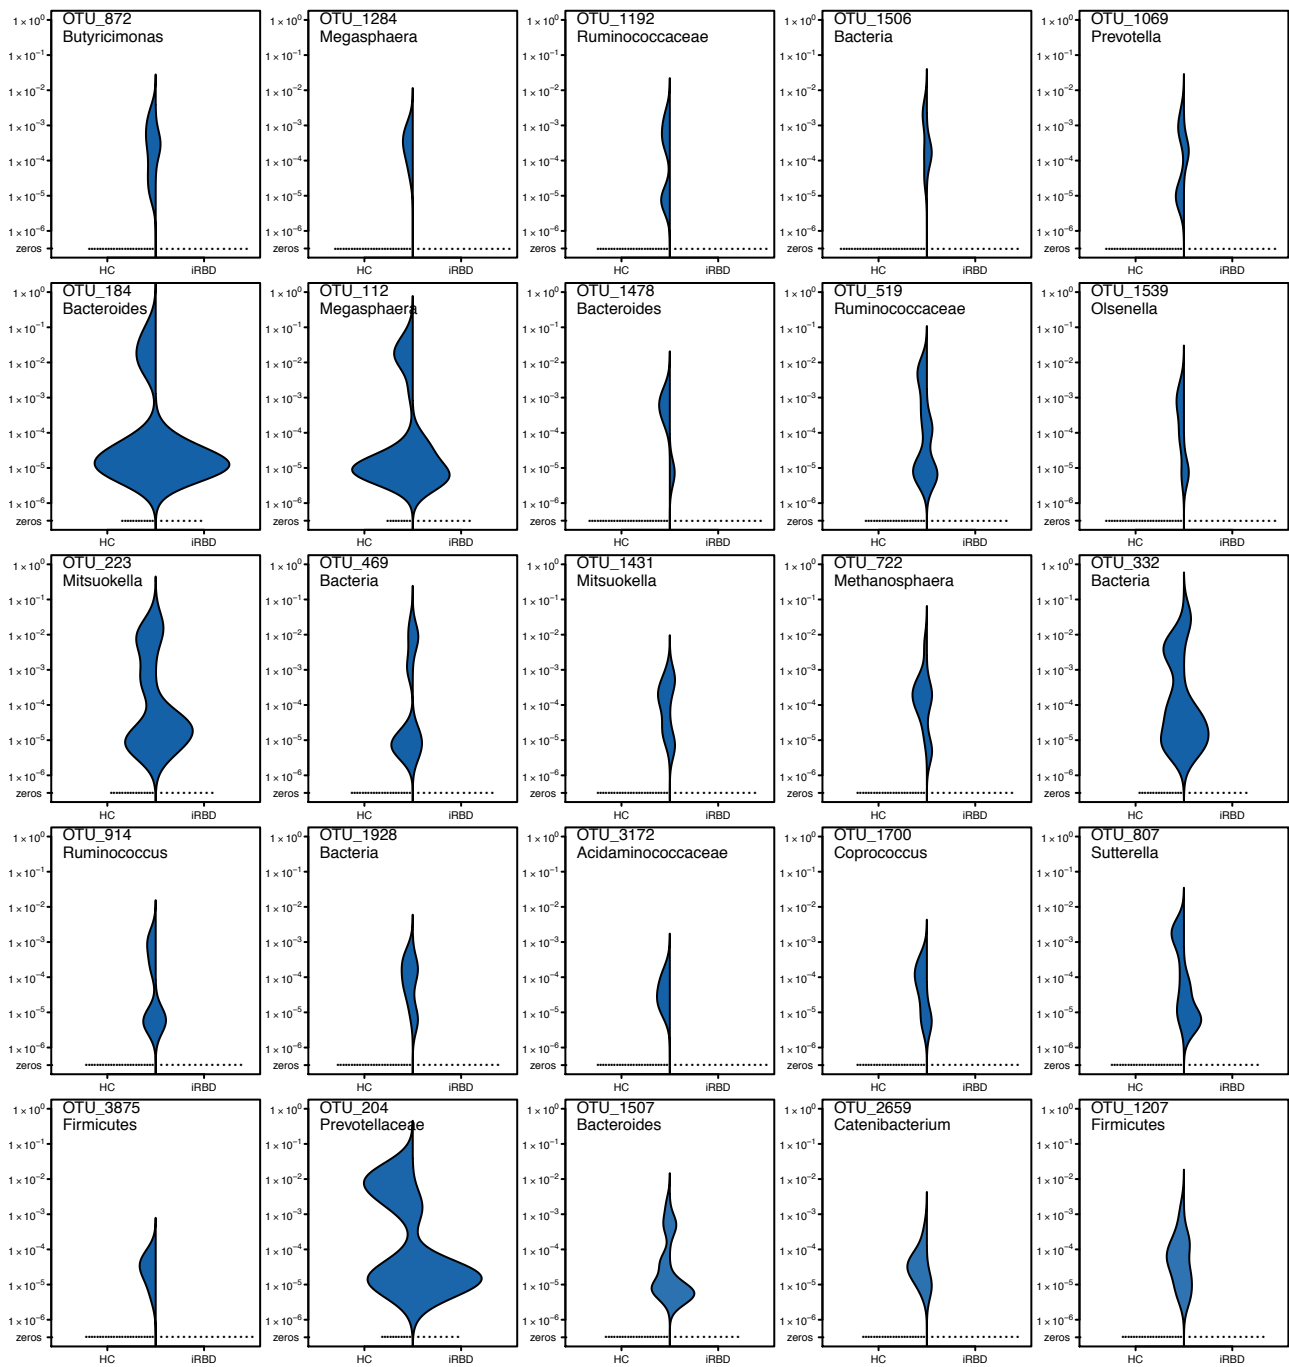

**Histograms (part 3):** Distributions of the relative abundances of bacterial OTUs in the gut microbiota that were found to be differentially abundant in individuals with iRBD compared to the healthy controls (FDR-adjusted P-values < 0.05). Relative abundances are estimated from sum-normalized rarefied data; only values for individuals without type 2 diabetes are shown; left: HC, right: iRBD.

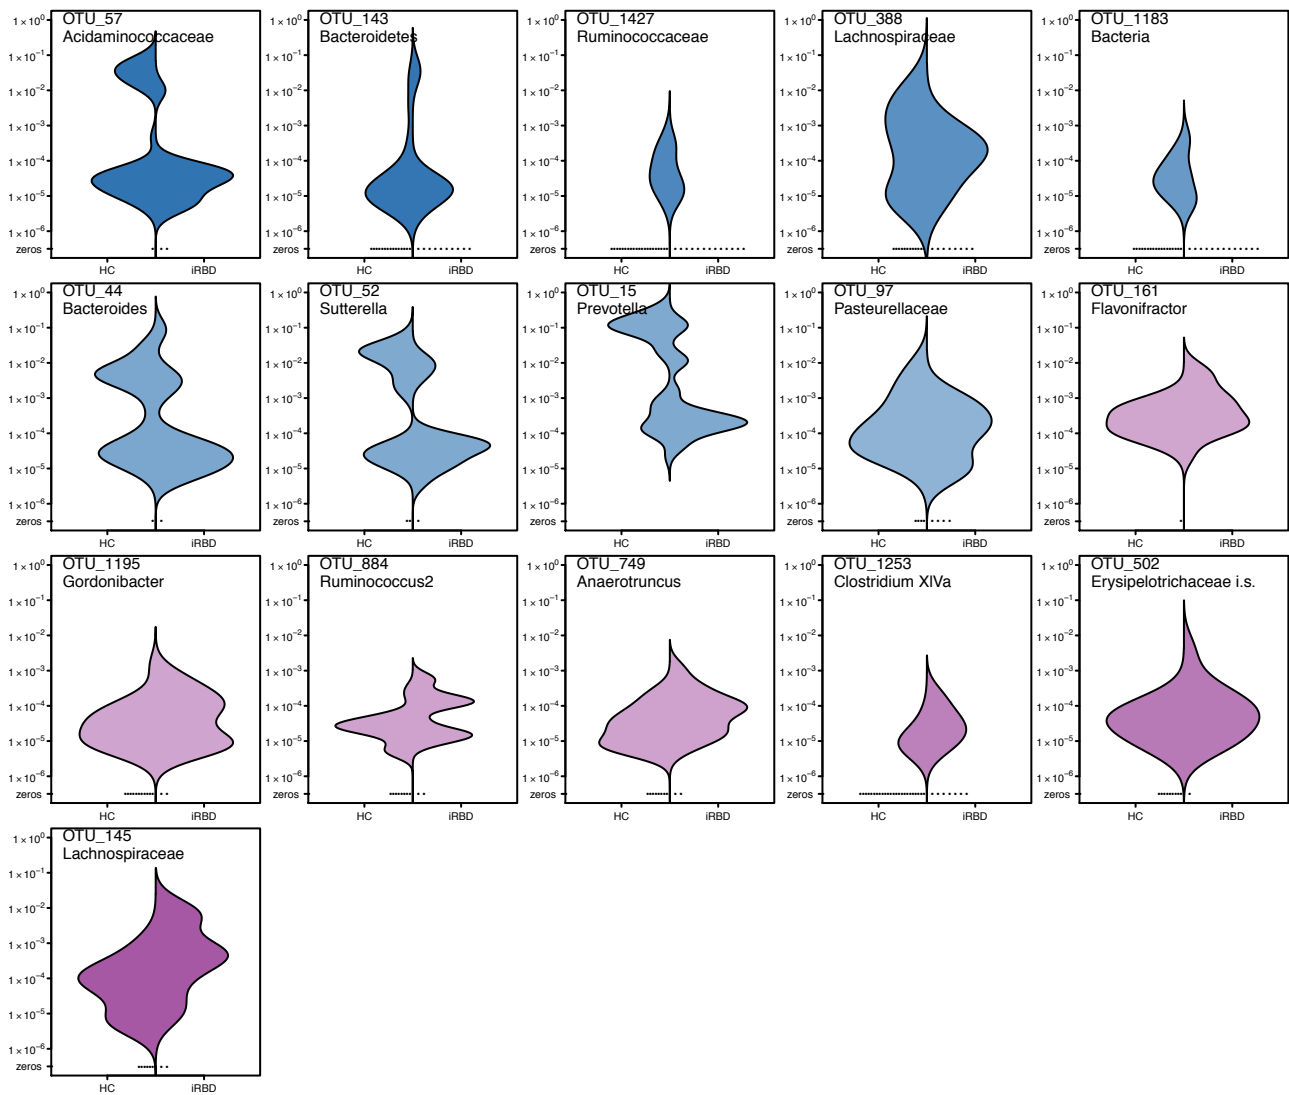

**Histograms (part 4):** Distributions of the relative abundances of bacterial OTUs in the gut microbiota that were found to be differentially abundant in individuals with iRBD compared to the healthy controls (FDR-adjusted P-values < 0.05). Relative abundances are estimated from sum-normalized rarefied data; only values for individuals without type 2 diabetes are shown; left: HC, right: iRBD.

## Overview of the relative abundances of all differentially abundant taxa

The following heatmaps facilitate the assessment of the detected differences from the point of view of varying normalization strategies.

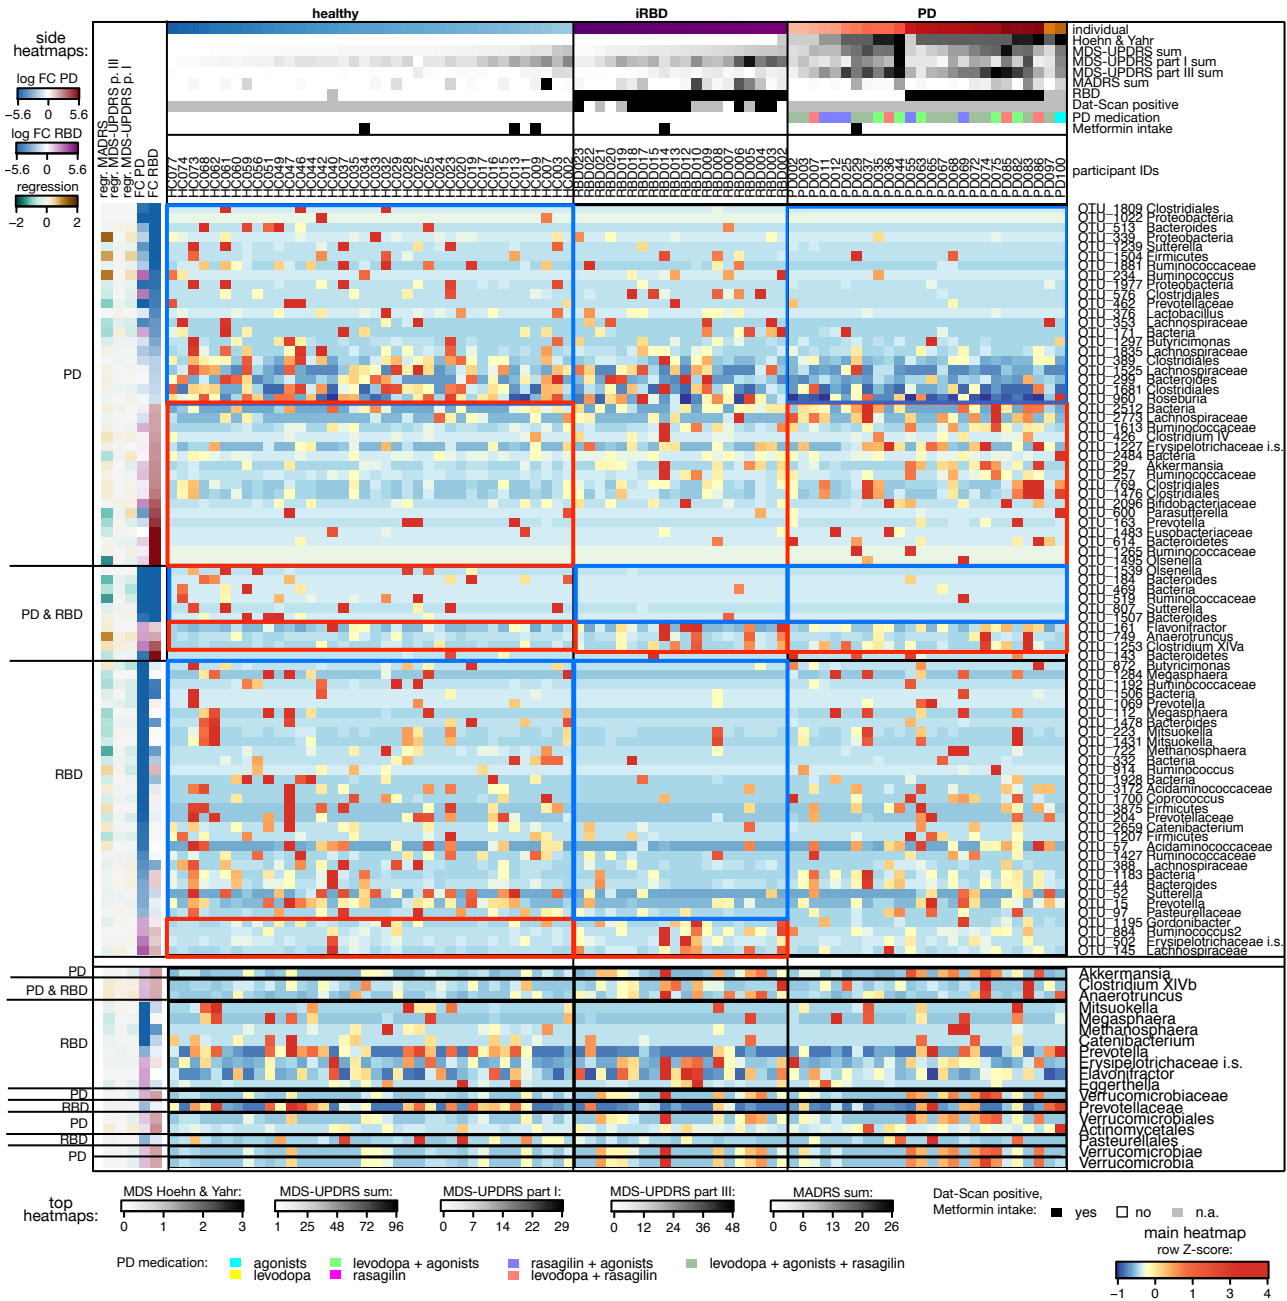

**Heatmaps of differentially abundant (absolute log<sub>2</sub> fold change > 1 and P-value < 0.05) taxa in PD patients and individuals with iRBD.** Relative abundances (based on DESeq2-normalization) of prokaryotic OTUs and higher-level taxa of the gut microbiome that were found to be differentially abundant in either PD patients, or iRBD patients or both compared to the healthy controls.

## Overview of relative abundances of all differentially abundant taxa, sum normalization

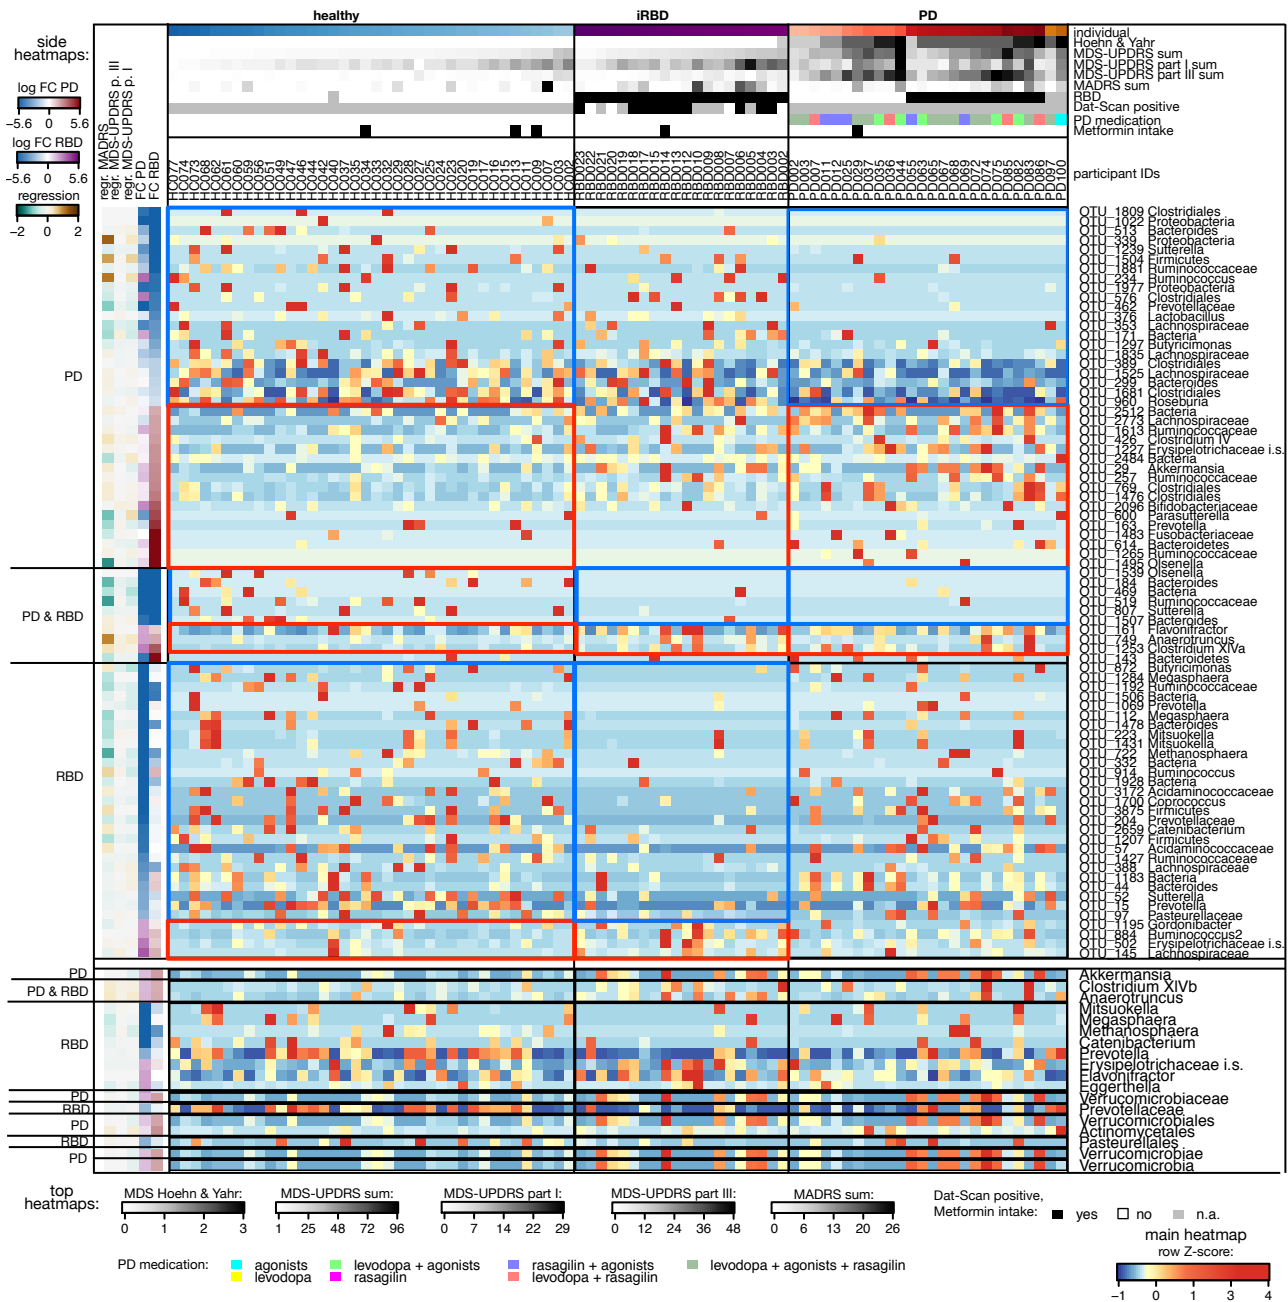

**Heatmaps of differentially abundant (absolute  $\log_2$  fold change  $> 1$  and P-value  $< 0.05$ ) taxa in PD patients and individuals with iRBD.** Relative abundances (after sum normalization of all reads) of prokaryotic OTUs and higher-level taxa of the gut microbiome that were found to be differentially abundant in either PD patients, or iRBD patients or both compared to the healthy controls.

## Overview of relative abundances of all differentially abundant taxa, sum normalization after rarefaction

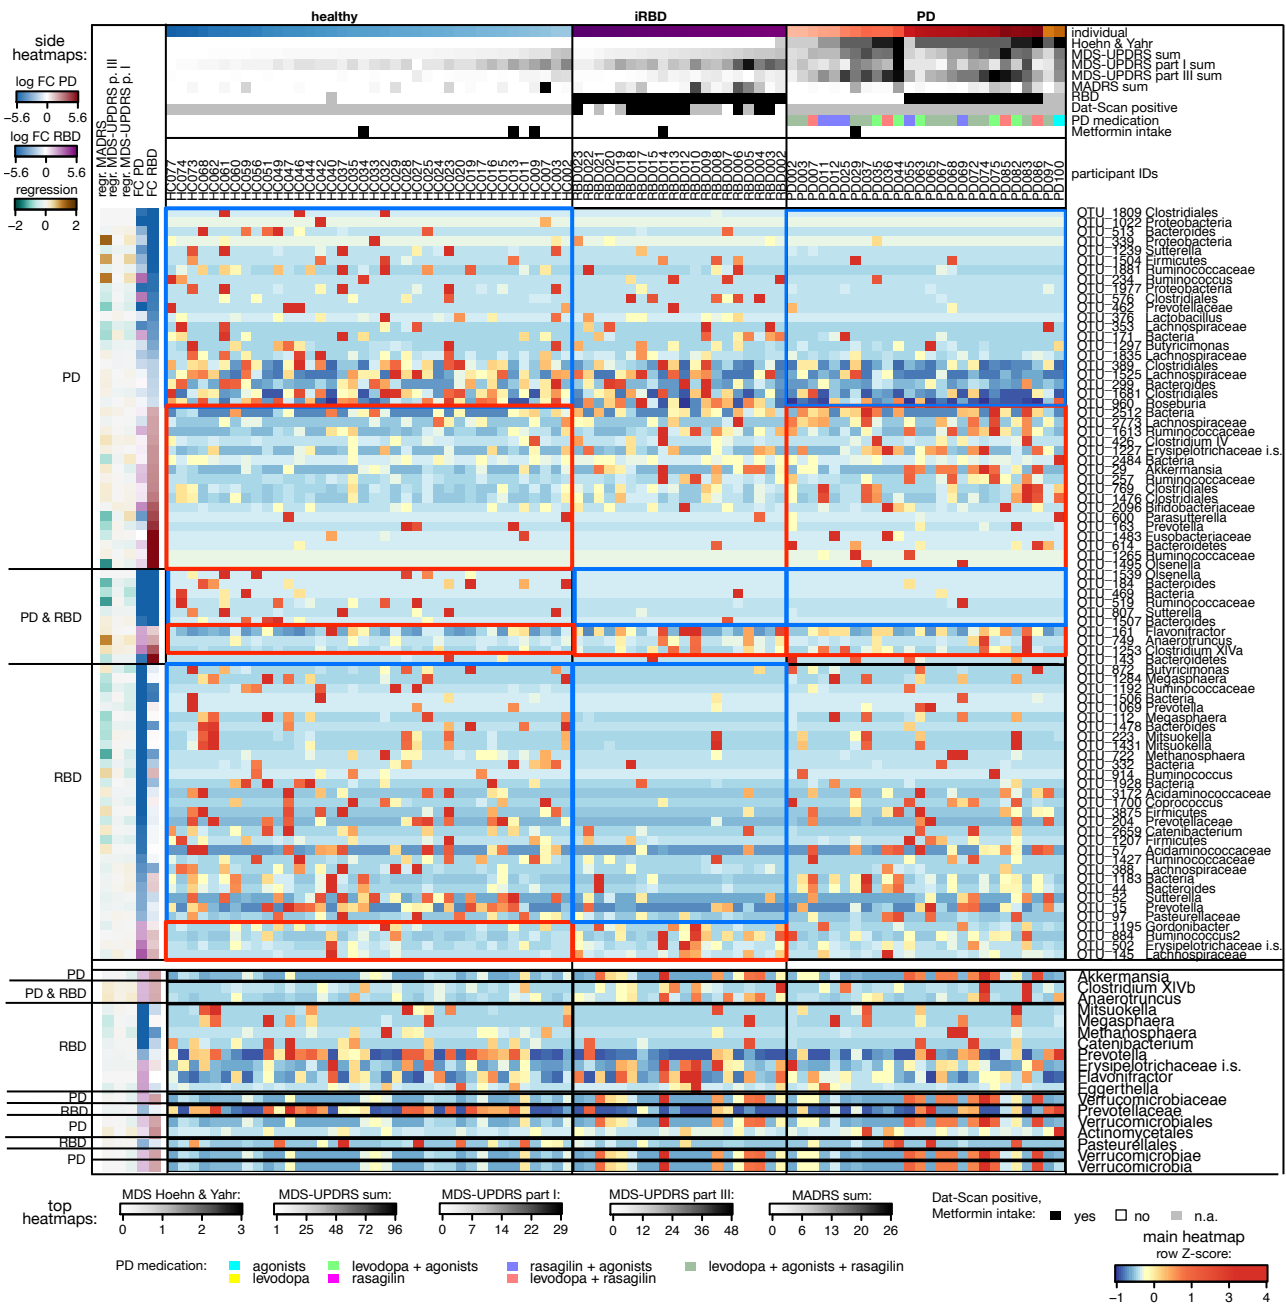

Heatmaps of differentially abundant (absolute  $\log_2$  fold change  $> 1$  and P-value  $< 0.05$ ) taxa in PD patients and individuals with iRBD. Relative abundances (after sum normalization of all rarefied datasets) of prokaryotic OTUs and higher-level taxa of the gut microbiome that were found to be differentially abundant in either PD patients, or iRBD patients or both compared to the healthy controls.

## Summarized results of the differential and regression analyses of the gut microbiota:

**Differential analyses of the gut microbiome at OTU level (D):** The fold change values are displayed in the two innermost heatmaps in **G.** \*\* (confirmed by ANCOM) and bold P-values are displayed in Figure 2.

| OTU and taxon                     | HC               | PD vs HC                     |                 | iRBD vs HC                   |              |
|-----------------------------------|------------------|------------------------------|-----------------|------------------------------|--------------|
|                                   | mean % abundance | log <sub>2</sub> fold change | adj. P value    | log <sub>2</sub> fold change | adj. P value |
| OTU_1809 Clostridiales            | 0.01             | -22.73                       | <b>1.85E-10</b> | -5.02                        | 0.513        |
| OTU_1022 Proteobacteria           | 0.04             | -22.70                       | <b>1.85E-10</b> | -6.94                        | 0.304        |
| OTU_513 <i>Bacteroides</i>        | 0.05             | -9.48                        | 0.001           | -2.80                        | 0.638        |
| OTU_339 Proteobacteria            | 0.14             | -8.39                        | <b>2.87E-04</b> | -1.58                        | 0.798        |
| OTU_1239 <i>Sutterella</i>        | 0.01             | -6.27                        | 0.001           | -3.80                        | 0.227        |
| OTU_1504 Firmicutes               | 3.5E-03          | -5.87                        | 0.020           |                              |              |
| OTU_1881 Ruminococcaceae          | 3.6E-03          | -5.59                        | 0.001           | -1.82                        | 0.557        |
| OTU_234 <i>Ruminococcus</i>       | 0.05             | -5.04                        | 0.001           | 3.29                         | 0.181        |
| OTU_1977 Proteobacteria           | 3.3E-03          | -5.03                        | 0.022           | -5.14                        | 0.145        |
| OTU_576 Clostridiales             | 0.01             | -4.64                        | 0.003           | 3.01                         | 0.181        |
| OTU_462 Prevotellaceae            | 0.06             | -4.55                        | 0.015           | -7.05                        | <b>0.001</b> |
| OTU_376 <i>Lactobacillus</i>      | 0.02             | -4.16                        | 0.007           |                              |              |
| OTU_353 Lachnospiraceae           | 0.07             | -3.72                        | 0.007           |                              |              |
| <b>OTU_171 Bacteria</b>           | 0.14             | -3.65                        | 0.021           | 2.02                         | 0.392        |
| OTU_1297 <i>Butyricimonas</i>     | 0.01             | -3.14                        | 0.035           | -1.00                        | 0.797        |
| OTU_1835 Lachnospiraceae          | 4.7E-03          | -2.49                        | 0.028           | -1.97                        | 0.181        |
| OTU_389 Clostridiales**           | 0.07             | -1.66                        | 0.004           | -1.34                        | 0.091        |
| OTU_1525 Lachnospiraceae          | 4.1E-03          | -1.65                        | 0.022           | -0.36                        | 0.896        |
| OTU_299 Bacteroides               | 0.08             | -1.46                        | 0.022           | 0.23                         | 0.936        |
| OTU_1681 Clostridiales            | 3.6E-03          | -1.38                        | 0.026           | -0.90                        | 0.329        |
| OTU_960 <i>Roseburia</i>          | 0.01             | -1.11                        | 0.044           | -0.30                        | 0.829        |
| OTU_2512 <b>Bacteria</b>          | 6.3E-04          | 1.95                         | <b>0.025</b>    | 0.46                         | 0.798        |
| OTU_2773 Lachnospiraceae          | 3.4E-04          | 2.11                         | <b>0.019</b>    |                              |              |
| OTU_1613 Ruminococcaceae          | 6.5E-04          | 2.12                         | <b>0.007</b>    | 1.77                         | 0.094        |
| OTU_426 <i>Clostridium IV</i>     | 0.01             | 2.24                         | <b>0.020</b>    |                              |              |
| OTU_1227 Erysipelotrichaceae i.s. | 2.7E-03          | 2.46                         | <b>0.039</b>    | 0.45                         | 0.930        |
| OTU_2484 <b>Bacteria</b>          | <b>1.0E-03</b>   | 2.47                         | <b>0.027</b>    | 0.32                         | 0.901        |
| OTU_29 <i>Akkermansia</i> **      | 0.54             | 2.61                         | <b>0.004</b>    | 1.32                         | 0.453        |
| OTU_257 Ruminococcaceae           | 0.01             | 2.67                         | <b>1.47E-07</b> |                              |              |
| OTU_769 Clostridiales             | 0.01             | 2.75                         | <b>0.001</b>    | 0.54                         | 0.798        |
| OTU_1476 Clostridiales            | 1.5E-03          | 3.01                         | <b>0.001</b>    | 0.57                         | 0.775        |
| OTU_2096 Bifidobacteriaceae       | 3.7E-04          | 3.77                         | <b>0.015</b>    | 2.60                         | 0.181        |
| OTU_600 <i>Parasutterella</i>     | 0.04             | 4.16                         | <b>0.019</b>    |                              |              |
| OTU_163 <i>Prevotella</i>         | 0.35             | 4.71                         | <b>1.42E-05</b> | -1.21                        | 0.501        |
| OTU_1483 Fusobacteriaceae         | 1.6E-03          | 8.12                         | <b>0.025</b>    | -0.01                        | 0.999        |
| OTU_614 Bacteroidetes             | 9.7E-04          | 11.37                        | <b>7.47E-06</b> |                              |              |
| OTU_1265 Ruminococcaceae          | 0                | 21.91                        | <b>3.93E-10</b> |                              |              |

|                                         |         |        |          |        |          |
|-----------------------------------------|---------|--------|----------|--------|----------|
| OTU_1495 <i>Olsenella</i>               | 0       | 22.03  | 3.71E-10 |        |          |
| OTU_1539 <i>Olsenella</i>               | 0.01    | -23.62 | 3.04E-17 | -8.50  | 0.038    |
| OTU_184 <i>Bacteroides</i>              | 0.50    | -6.76  | 1.92E-06 | -9.70  | 2.10E-10 |
| <b>OTU_469 Bacteria</b>                 | 0.06    | -8.13  | 4.58E-04 | -8.04  | 0.003    |
| OTU_519 Ruminococcaceae                 | 0.06    | -6.11  | 0.007    | -9.00  | 4.37E-04 |
| OTU_807 <i>Sutterella</i>               | 0.02    | -8.33  | 0.001    | -6.21  | 0.038    |
| OTU_1507 <i>Bacteroides</i>             | 0.01    | -6.34  | 0.004    | -5.04  | 0.038    |
| OTU_161 <i>Flavonifractor</i> **        | 0.04    | 1.21   | 0.015    | 2.01   | 0.002    |
| OTU_749 <i>Anaerotruncus</i>            | 3.4E-03 | 1.99   | 0.026    | 2.09   | 0.037    |
| OTU_1253 <i>Clostridium XIVa</i>        | 4.5E-04 | 3.85   | 0.001    | 2.83   | 0.040    |
| OTU_143 Bacteroidetes                   | 0.07    | 5.60   | 1.42E-05 | -4.85  | 0.003    |
| OTU_872 <i>Butyricimonas</i>            | 0.01    | -0.65  | 0.935    | -25.31 | 5.56E-25 |
| OTU_1284 <i>Megasphaera</i>             | 0.01    | -0.19  | 0.988    | -23.14 | 6.40E-16 |
| OTU_1192 Ruminococcaceae                | 0.01    | -4.55  | 0.209    | -22.85 | 2.52E-16 |
| OTU_1506 <b>Bacteria</b>                | 0.01    | -4.73  | 0.489    | -21.71 | 2.26E-08 |
| OTU_1069 <i>Prevotella</i>              | 0.01    | 0.40   | 0.966    | -21.11 | 9.65E-10 |
| OTU_112 <i>Megasphaera</i>              | 0.35    | 0.20   | 0.974    | -9.47  | 6.43E-11 |
| OTU_1478 <i>Bacteroides</i>             | 0.01    | -3.82  | 0.347    | -9.14  | 0.032    |
| OTU_223 <i>Mitsuokella</i>              | 0.14    | 0.16   | 0.982    | -8.40  | 1.97E-07 |
| OTU_1431 <i>Mitsuokella</i>             | 4.4E-03 | 0.15   | 0.992    | -7.59  | 0.015    |
| OTU_722 <i>Methanosphaera</i>           | 0.02    | -3.53  | 0.199    | -7.58  | 0.007    |
| OTU_332 <b>Bacteria</b>                 | 0.08    | -1.87  | 0.512    | -7.30  | 4.64E-06 |
| OTU_914 <i>Ruminococcus</i>             | 0.01    | 1.69   | 0.833    | -7.06  | 0.016    |
| OTU_1928 <b>Bacteria</b>                | 4.4E-03 | -2.43  | 0.512    | -6.99  | 0.040    |
| OTU_3172 Acidaminococcaceae             | 1.1E-03 | -0.68  | 0.887    | -6.84  | 0.023    |
| OTU_1700 <i>Coprococcus</i>             | 2.7E-03 | 0.40   | 0.960    | -6.79  | 0.017    |
| OTU_3875 Firmicutes                     | 4.7E-03 | -0.45  | 0.930    | -5.97  | 0.022    |
| OTU_204 Prevotellaceae                  | 0.25    | -0.53  | 0.912    | -5.43  | 0.001    |
| OTU_2659 <i>Catenibacterium</i>         | 1.7E-03 | -0.25  | 0.966    | -5.04  | 0.034    |
| OTU_1207 Firmicutes                     | 0.01    | -0.26  | 0.966    | -4.97  | 0.038    |
| OTU_57 Acidaminococcaceae               | 1.1     | 0.08   | 0.992    | -4.89  | 1.06E-04 |
| OTU_1427 Ruminococcaceae                | 4.3E-03 | -0.28  | 0.966    | -4.24  | 0.037    |
| OTU_388 Lachnospiraceae                 | 0.12    | -3.08  | 0.074    | -3.96  | 0.023    |
| OTU_1183 <b>Bacteria</b>                | 4.2E-03 | 1.09   | 0.557    | -3.56  | 0.038    |
| OTU_44 <i>Bacteroides</i>               | 0.76    | 1.26   | 0.419    | -3.15  | 0.008    |
| OTU_52 <i>Sutterella</i>                | 0.80    | -1.29  | 0.498    | -3.06  | 0.032    |
| OTU_15 <i>Prevotella</i> **             | 7.3     | -0.51  | 0.834    | -3.04  | 0.010    |
| OTU_97 Pasteurellaceae                  | 0.09    | -0.73  | 0.786    | -2.70  | 0.037    |
| OTU_1195 Gordonibacter                  | 0.01    | 0.51   | 0.843    | 2.03   | 0.048    |
| OTU_884 <i>Ruminococcus 2</i>           | 3.1E-03 | 1.46   | 0.111    | 2.07   | 0.028    |
| OTU_502 Erysipelotrichaceae <i>i.s.</i> | 0.01    | 1.23   | 0.209    | 2.96   | 0.001    |
| OTU_145 Lachnospiraceae                 | 0.07    | 1.80   | 0.084    | 3.70   | 9.81E-05 |



**Summarized results of the regression analyses of the gut microbiome of the PD cohort at OTU level (D):** These values are displayed in the three outermost heatmaps in G.

| OTU and taxon                     | MDS-UPDRS part I sum |              | MDS-UPDRS part III sum |              | MADRS sum       |              |
|-----------------------------------|----------------------|--------------|------------------------|--------------|-----------------|--------------|
|                                   | change per unit      | adj. P value | change per unit        | adj. P value | change per unit | adj. P value |
| OTU_1809 Clostridiales            |                      |              |                        |              |                 |              |
| OTU_1022 Proteobacteria           |                      |              |                        |              |                 |              |
| OTU_513 <i>Bacteroides</i>        |                      |              |                        |              |                 |              |
| OTU_339 Proteobacteria            | 0.34                 | 0.306        | 0.02                   | 0.959        |                 |              |
| OTU_1239 <i>Sutterella</i>        |                      |              |                        |              |                 |              |
| OTU_1504 Firmicutes               | <b>0.54</b>          | <b>0.043</b> |                        |              | <b>0.69</b>     | <b>0.047</b> |
| OTU_1881 Ruminococcaceae          |                      |              |                        |              |                 |              |
| OTU_234 <i>Ruminococcus</i>       | 0.40                 | 0.150        | 0.02                   | 0.957        |                 |              |
| OTU_1977 Proteobacteria           |                      |              |                        |              |                 |              |
| OTU_576 Clostridiales             |                      |              |                        |              |                 |              |
| OTU_462 Prevotellaceae            |                      |              | -0.15                  | 0.401        |                 |              |
| OTU_376 <i>Lactobacillus</i>      |                      |              |                        |              |                 |              |
| OTU_353 Lachnospiraceae           |                      |              | <b>-0.25</b>           | <b>0.019</b> |                 |              |
| <b>OTU_171 Bacteria</b>           | <b>-0.44</b>         | <b>0.043</b> |                        |              | -0.44           | 0.127        |
| OTU_1297 <i>Butyricimonas</i>     |                      |              | -0.12                  | 0.411        | 0.19            | 0.606        |
| OTU_1835 Lachnospiraceae          | -0.04                | 0.924        | -0.06                  | 0.440        | 0.07            | 0.840        |
| OTU_389 Clostridiales             | -0.05                | 0.792        | -0.07                  | 0.200        | 0.00            | 0.998        |
| OTU_1525 Lachnospiraceae          | 0.08                 | 0.572        | 0.02                   | 0.864        | 0.15            | 0.493        |
| OTU_299 Bacteroides               | 0.03                 | 0.793        | -0.01                  | 0.891        | 0.07            | 0.667        |
| OTU_1681 Clostridiales            | -0.13                | 0.336        | -0.10                  | 0.087        | -0.06           | 0.862        |
| OTU_960 <i>Roseburia</i>          | 0.09                 | 0.415        | 0.02                   | 0.864        | 0.08            | 0.695        |
| OTU_2512 <b>Bacteria</b>          | 0.02                 | 0.937        | 0.09                   | 0.145        | 0.21            | 0.216        |
| OTU_2773 Lachnospiraceae          | -0.02                | 0.968        | 0.02                   | 0.864        | 0.06            | 0.845        |
| OTU_1613 Ruminococcaceae          | -0.07                | 0.714        | 0.04                   | 0.716        | 0.16            | 0.504        |
| OTU_426 <i>Clostridium IV</i>     | 0.15                 | 0.474        | 0.11                   | 0.346        |                 |              |
| OTU_1227 Erysipelotrichaceae i.s. | 0.00                 | 0.990        | 0.04                   | 0.724        | -0.08           | 0.837        |
| OTU_2484 <b>Bacteria</b>          | <b>0.32</b>          | <b>0.049</b> | -0.08                  | 0.543        | <b>0.52</b>     | <b>0.027</b> |
| OTU_29 <i>Akkermansia</i>         | -0.26                | 0.037        | 0.01                   | 0.962        | 0.08            | 0.825        |
| OTU_257 Ruminococcaceae           | -0.07                | 0.709        | 0.03                   | 0.758        | 0.25            | 0.087        |
| OTU_769 Clostridiales             |                      |              | 0.02                   | 0.856        | 0.26            | 0.130        |
| OTU_1476 Clostridiales            | 0.09                 | 0.688        | 0.03                   | 0.810        | 0.20            | 0.472        |
| OTU_2096 Bifidobacteriaceae       | 0.13                 | 0.709        | 0.15                   | 0.179        |                 |              |
| OTU_600 <i>Parasutterella</i>     |                      |              | -0.09                  | 0.679        | <b>0.92</b>     | <b>0.008</b> |
| OTU_163 <i>Prevotella</i>         | -0.26                | 0.329        |                        |              | -0.33           | 0.331        |
| OTU_1483 Fusobacteriaceae         | 0.03                 | 0.984        | 0.05                   | 0.864        | -0.30           | 0.616        |
| OTU_614 Bacteroidetes             |                      |              |                        |              | 0.22            | 0.692        |
| OTU_1265 Ruminococcaceae          |                      |              |                        |              | 0.57            | 0.187        |
| OTU_1495 <i>Olsenella</i>         |                      |              |                        |              | -0.29           | 0.621        |

|                                         |              |              |              |              |              |              |
|-----------------------------------------|--------------|--------------|--------------|--------------|--------------|--------------|
| OTU_1539 <i>Olsenella</i>               |              |              |              |              |              |              |
| OTU_184 <i>Bacteroides</i>              |              |              | -0.17        | 0.149        | -0.14        | 0.732        |
| <b>OTU_469 Bacteria</b>                 | <b>-0.67</b> | <b>0.011</b> | -0.12        | 0.574        |              |              |
| OTU_519 Ruminococcaceae                 |              |              |              |              |              |              |
| OTU_807 <i>Sutterella</i>               |              |              |              |              |              |              |
| OTU_1507 <i>Bacteroides</i>             |              |              |              |              |              |              |
| OTU_161 <i>Flavonifractor</i>           | 0.01         | 0.982        | 0.03         | 0.608        | 0.09         | 0.512        |
| OTU_749 <i>Anaerotruncus</i>            | <b>0.34</b>  | <b>0.011</b> | <b>0.16</b>  | <b>0.036</b> | <b>0.36</b>  | <b>0.047</b> |
| OTU_1253 <i>Clostridium XIVa</i>        | 0.12         | 0.572        | 0.17         | 0.047        | 0.20         | 0.546        |
| OTU_143 Bacteroidetes                   |              |              |              |              | -0.10        | 0.862        |
| OTU_872 <i>Butyricimonas</i>            | <b>-0.64</b> | <b>0.011</b> | <b>-0.30</b> | <b>0.014</b> | 0.30         | 0.616        |
| OTU_1284 <i>Megasphaera</i>             | 0.00         | 0.997        | 0.00         | 0.986        |              |              |
| OTU_1192 Ruminococcaceae                |              |              | -0.19        | 0.271        |              |              |
| OTU_1506 <b>Bacteria</b>                |              |              |              |              |              |              |
| OTU_1069 <i>Prevotella</i>              | -0.39        | 0.174        | -0.18        | 0.238        | -0.37        | 0.466        |
| OTU_112 <i>Megasphaera</i>              | -0.03        | 0.965        |              |              |              |              |
| OTU_1478 <i>Bacteroides</i>             | -0.16        | 0.709        | -0.13        | 0.428        |              |              |
| OTU_223 <i>Mitsuokella</i>              | 0.04         | 0.942        |              |              | -0.13        | 0.825        |
| OTU_1431 <i>Mitsuokella</i>             | -0.02        | 0.988        |              |              | -0.16        | 0.806        |
| OTU_722 <i>Methanosphaera</i>           |              |              |              |              |              |              |
| OTU_332 <b>Bacteria</b>                 | -0.24        | 0.335        | -0.10        | 0.505        | 0.19         | 0.608        |
| OTU_914 <i>Ruminococcus</i>             |              |              | 0.10         | 0.677        | <b>0.89</b>  | <b>0.023</b> |
| OTU_1928 <b>Bacteria</b>                | -0.08        | 0.902        | 0.00         | 0.986        | -0.26        | 0.617        |
| OTU_3172 Acidaminococcaceae             | -0.06        | 0.902        | -0.06        | 0.717        | 0.09         | 0.865        |
| OTU_1700 <i>Coprococcus</i>             | -0.21        | 0.446        |              |              | -0.27        | 0.570        |
| OTU_3875 Firmicutes                     |              |              |              |              |              |              |
| OTU_204 Prevotellaceae                  | <b>-0.37</b> | <b>0.043</b> |              |              | <b>-0.71</b> | <b>0.004</b> |
| OTU_2659 <i>Catenibacterium</i>         | -0.06        | 0.935        | -0.04        | 0.864        | -0.12        | 0.870        |
| OTU_1207 Firmicutes                     | -0.30        | 0.284        | -0.15        | 0.294        | -0.32        | 0.501        |
| OTU_57 Acidaminococcaceae               | -0.01        | 0.984        | -0.01        | 0.955        | 0.14         | 0.670        |
| OTU_1427 Ruminococcaceae                |              |              | -0.08        | 0.720        |              |              |
| OTU_388 Lachnospiraceae                 | 0.16         | 0.562        | 0.08         | 0.580        |              |              |
| OTU_1183 <b>Bacteria</b>                | 0.13         | 0.424        | 0.04         | 0.740        | -0.01        | 0.984        |
| OTU_44 <i>Bacteroides</i>               |              |              | 0.06         | 0.550        | 0.02         | 0.968        |
| OTU_52 <i>Sutterella</i>                | -0.02        | 0.966        | -0.08        | 0.549        | -0.02        | 0.965        |
| OTU_15 <i>Prevotella</i>                | -0.14        | 0.335        | -0.07        | 0.411        | -0.17        | 0.504        |
| OTU_97 Pasteurellaceae                  | 0.05         | 0.880        |              |              | -0.02        | 0.973        |
| OTU_1195 Gordonibacter                  |              |              | 0.05         | 0.750        | <b>0.41</b>  | <b>0.004</b> |
| OTU_884 <i>Ruminococcus 2</i>           | 0.05         | 0.842        | -0.02        | 0.864        | 0.25         | 0.068        |
| OTU_502 Erysipelotrichaceae <i>i.s.</i> | 0.08         | 0.596        |              |              | 0.07         | 0.788        |
| OTU_145 Lachnospiraceae                 | -0.01        | 0.984        | <b>0.16</b>  | <b>0.027</b> |              |              |

**Summarized results of the differential analyses of the gut microbiome at higher taxonomic levels (E):**

These values are displayed in the two innermost heatmaps in **G**. \*\* (confirmed by ANCOM and P-values < 0.001 are displayed in **Figure 2**.

| taxon                                     | HC               | PD vs HC                     |              | iRBD vs HC                   |              |
|-------------------------------------------|------------------|------------------------------|--------------|------------------------------|--------------|
|                                           | mean % abundance | log <sub>2</sub> fold change | adj. P value | log <sub>2</sub> fold change | adj. P value |
| <i>Akkermansia</i> **                     | 0.63             | 2.23                         | 0.014        | 1.52                         | 0.292        |
| <i>Clostridium XIVb</i>                   | 0.01             | 1.88                         | 0.011        | 1.58                         | 0.024        |
| <i>Anaerotruncus</i>                      | 0.02             | 1.96                         | 0.010        | 1.64                         | 0.020        |
| <i>Mitsuokella</i>                        | 1.9E-03          | -1.35                        | 0.848        | -7.83                        | 4.47E-09     |
| <i>Megasphaera</i>                        | 0.02             | 0.23                         | 0.974        | -7.61                        | 1.56E-10     |
| <i>Methanosphaera</i>                     | 0.11             | -3.79                        | 0.246        | -7.45                        | 0.004        |
| <i>Catenibacterium</i>                    | 0.13             | -1.54                        | 0.908        | -6.05                        | 0.005        |
| <i>Prevotella</i> **                      | 0.41             | -0.53                        | 0.974        | -2.81                        | 0.004        |
| <i>Erysipelotrichaceae incertae sedis</i> | 0.02             | 0.69                         | 0.723        | 1.81                         | 0.020        |
| <i>Flavonifractor</i>                     | 0.25             | 0.03                         | 0.977        | 2.06                         | 9.52E-05     |
| <i>Eggerthella</i>                        | 12.4             | -1.04                        | 0.663        | 2.14                         | 0.042        |
| Verrucomicrobiaceae**                     | 0.63             | 2.20                         | 0.035        | 1.71                         | 0.340        |
| Prevotellaceae**                          | 13.6             | -0.46                        | 0.981        | -2.44                        | 0.017        |
| Verrucomicrobiales**                      | 0.00             | 2.08                         | 0.017        | 1.30                         | 0.431        |
| Actinomycetales**                         | 0.63             | 2.58                         | 0.001        | 0.77                         | 0.626        |
| Pasteurellales                            | 0.10             |                              |              | -2.76                        | 0.034        |
| Verrucomicrobiae**                        | 0.63             | 2.13                         | 0.012        | 1.40                         | 0.352        |
| Verrucomicrobia**                         | 0.64             | 2.06                         | 0.007        | 1.48                         | 0.160        |

**Summarized results of the regression analyses of the gut microbiome of the PD cohort at higher taxonomic levels (E):** These values are displayed in the three outermost heatmaps in **G**.

| taxon                                        | MDS-UPDRS part I sum |              | MDS-UPDRS part III sum |              | MADRS sum       |              |
|----------------------------------------------|----------------------|--------------|------------------------|--------------|-----------------|--------------|
|                                              | change per unit      | adj. P value | change per unit        | adj. P value | change per unit | adj. P value |
| <i>Akkermansia</i>                           | -0.23                | 0.016        | 0.00                   | 0.981        | 0.00            | 0.996        |
| <i>Clostridium XIVb</i>                      | 0.14                 | 0.290        | 0.12                   | 0.040        | 0.26            | 0.163        |
| <i>Anaerotruncus</i>                         | 0.26                 | 4.39E-04     | 0.11                   | 0.040        | 0.31            | 0.022        |
| <i>Mitsuokella</i>                           | 0.01                 | 0.962        |                        |              | -0.16           | 0.873        |
| <i>Megasphaera</i>                           | -0.06                | 0.928        |                        |              |                 |              |
| <i>Methanosphaera</i>                        |                      |              |                        |              | -0.36           | 0.873        |
| <i>Catenibacterium</i>                       |                      |              | -0.04                  | 0.902        | -0.12           | 0.932        |
| <i>Prevotella</i>                            | -0.03                | 0.938        | -0.08                  | 0.417        | -0.07           | 0.873        |
| Erysipelotrichaceae<br><i>incertae sedis</i> | -0.08                | 0.443        | -0.08                  | 0.040        | -0.09           | 0.873        |
| <i>Flavonifractor</i>                        | 0.00                 | 0.962        | 0.01                   | 0.902        | 0.01            | 0.996        |
| <i>Eggerthella</i>                           |                      |              | -0.03                  | 0.902        | -0.28           | 0.247        |
| Verrucomicrobiaceae                          | -0.21                | 0.040        | 0.01                   | 0.876        | 0.04            | 0.968        |
| Prevotellaceae                               | -0.05                | 0.826        | -0.09                  | 0.195        | -0.09           | 0.705        |
| Verrucomicrobiales                           | -0.20                | 0.021        | 0.00                   | 0.951        | 0.03            | 0.960        |
| Actinomycetales                              | 0.22                 | 0.010        | 0.02                   | 0.797        | 0.22            | 0.368        |
| Pasteurellales                               |                      |              |                        |              | 0.08            | 0.940        |
| Verrucomicrobiae                             | -0.20                | 0.024        | 0.01                   | 0.865        | 0.03            | 0.941        |
| Verrucomicrobia                              | -0.17                | 0.107        | 0.00                   | 0.969        | 0.00            | 0.934        |

## Supplementary References

1. Mathay C, Hamot G, Henry E, et al. Method Optimization for Fecal Sample Collection and Fecal DNA Extraction. *Biopreserv Biobank* 2015;13:79–93.
2. Suzuki MT, Taylor LT, DeLong EF. Quantitative analysis of small-subunit rRNA genes in mixed microbial populations via 5'-nuclease assays. *Applied and Environmental Microbiology* 2000;66:4605–14.
3. Hugerth LW, Wefer HA, Lundin S. DegePrime, a program for degenerate primer design for broad-taxonomic-range PCR in microbial ecology studies. *Applied and Environmental Microbiology* 2014;80:5116-23.
4. Herlemann DP, Labrenz M, Jürgens K, Bertilsson S, Waniek JJ, Andersson AF. Transitions in bacterial communities along the 2000 km salinity gradient of the Baltic Sea. *The ISME Journal* 2011;5:1571–9.
5. Hugerth LW, Muller EEL, Hu YOO, et al. Systematic Design of 18S rRNA Gene Primers for Determining Eukaryotic Diversity in Microbial Consortia. *PLoS ONE* 2014;9:e95567.
6. Hildebrand F, Tadeo R, Voigt AY, Bork P, Raes J. LotuS: an efficient and user-friendly OTU processing pipeline. *Microbiome* 2014;2:30.
7. R Core Team. *R: A Language and Environment for Statistical Computing*. Vienna, Austria: 2014.
8. Hu YOO, Karlson B, Charvet S, Andersson AF. Diversity of Pico- to Mesoplankton along the 2000 km Salinity Gradient of the Baltic Sea. *Frontiers in Microbiology*

2016;7:679.

9. Guillou L, Bachar D, Audic S, et al. The Protist Ribosomal Reference database (PR2): a catalog of unicellular eukaryote Small Sub-Unit rRNA sequences with curated taxonomy. *Nucleic Acids Research* 2012;41:D597–D604.
10. Narayanasamy S, Jarosz Y, Muller EEL, et al. IMP: a pipeline for reproducible metagenomic and metatranscriptomic analyses. *Genome Biol* 2016;17:260.
11. Eddy SR. Accelerated Profile HMM Searches. *PLoS Comput Biol* 2011;7:e1002195.
12. Heintz-Buschart A, May P, Laczny CC, et al. Integrated multi-omics of the human gut microbiome in a case study of familial type 1 diabetes. *Nature Microbiology* 2016;2:16180.
13. Dueholm MS, Albertsen M, Otzen D, Nielsen PH. Curli Functional Amyloid Systems Are Phylogenetically Widespread and Display Large Diversity in Operon and Protein Structure. *PLoS ONE* 2012;7:e51274.
14. Fu L, Niu B, Zhu Z, Wu S, Li W. CD-HIT: accelerated for clustering the next-generation sequencing data. *Bioinformatics* 2012;28:3150–2.
15. Langmead B, Salzberg SL. Fast gapped-read alignment with Bowtie 2. *Nat Methods* 2012;9:357–9.
16. Mende DR, Sunagawa S, Zeller G, Bork P. Accurate and universal delineation of prokaryotic species. *Nat Methods* 2013;10:881–4.
17. Kultima JR, Sunagawa S, Li J, et al. MOCAT: a metagenomics assembly and gene prediction toolkit. *PLoS ONE* 2012;7:e47656.

18. Sunagawa S, Mende DR, Zeller G, et al. Metagenomic species profiling using universal phylogenetic marker genes. *Nat Methods* 2013;10:1196–9.
19. Nielsen HB, Almeida M, Juncker AS, et al. Identification and assembly of genomes and genetic elements in complex metagenomic samples without using reference genomes. *Nat Biotechnol* 2014;32:822–8.
20. Aziz RK, Bartels D, Best AA, et al. The RAST Server: rapid annotations using subsystems technology. *BMC Genomics* 2008;9:75.
21. Laczny CC, Muller EEL, Heintz-Buschart A, et al. Identification, Recovery, and Refinement of Hitherto Undescribed Population-Level Genomes from the Human Gastrointestinal Tract. *Frontiers in Microbiology* 2016;7:533.
22. Di Rienzi SC, Sharon I, Wrighton KC, et al. The human gut and groundwater harbor non-photosynthetic bacteria belonging to a new candidate phylum sibling to Cyanobacteria. *eLife* 2013;2:e01102.
23. Rantala-Ylinen A, Kana S, Wang H, et al. Anatoxin-a Synthetase Gene Cluster of the Cyanobacterium *Anabaena* sp. Strain 37 and Molecular Methods To Detect Potential Producers. *Applied and Environmental Microbiology* 2011;77:7271–8.
24. Méjean A, Paci G, Gautier V, Ploux O. Biosynthesis of anatoxin-a and analogues (anatoxins) in cyanobacteria. *Toxicon* 2014;91:15–22.
25. Kellmann R, Mihali TK, Jeon YJ, Pickford R, Pomati F, Neilan BA. Biosynthetic Intermediate Analysis and Functional Homology Reveal a Saxitoxin Gene Cluster in Cyanobacteria. *Applied and Environmental Microbiology* 2008;74:4044–53.
