# Supplementary material for: The nasal and gut microbiome in Parkinson's disease and idiopathic rapid eye movement sleep behavior disorder
Source: PubMed Central journal article supplement (PMC5811909; doi:10.1002/mds.27105), 2017-08-26
Supplement: MDS-33-88-s002.pdf [file MDS-33-88-s002.pdf]

Characteristics of the whole cohort

| Study group                                                                                                            | N | HC<br>78        | PD<br>76                                                                     | iRBD<br>21                                                                  |
|------------------------------------------------------------------------------------------------------------------------|---|-----------------|------------------------------------------------------------------------------|-----------------------------------------------------------------------------|
| <b>Demographics</b>                                                                                                    |   |                 |                                                                              |                                                                             |
| Male/female (% male)                                                                                                   |   | 46/32 (59%)     | 50/26 (66%)                                                                  | 12/9 (57%)                                                                  |
| age, years [mean +/- standard deviation]                                                                               |   | 68.45 +/- 6.71  | 68.04 +/- 9.7                                                                | 66.14 +/- 9.93                                                              |
| <b>Anthropometrics</b>                                                                                                 |   |                 |                                                                              |                                                                             |
| weight, kg [mean +/- standard deviation]                                                                               |   | 80.15 +/- 16.02 | 83.68 +/- 15.52                                                              | 78.01 +/- 14.28                                                             |
| height, cm [mean +/- standard deviation]                                                                               |   | 173.26 +/- 8.84 | 171.4 +/- 9.66                                                               | 172.38 +/- 10.05                                                            |
| BMI, kg/(m*m) [mean +/- standard deviation]                                                                            |   | 26.54 +/- 4.07  | 28.46 +/- 4.52                                                               | 26.15 +/- 3.44                                                              |
| <b>Motor Symptoms</b>                                                                                                  |   |                 |                                                                              |                                                                             |
| Hoehn and Yahr staging [mean +/- standard deviation]                                                                   |   | 0 +/- 0         | 2.13 +/- 0.8                                                                 | 0.05 +/- 0.22                                                               |
| MDS-UPDRS II, sum [mean +/- standard deviation]                                                                        |   | 1.47 +/- 2.04   | 13.15 +/- 7.43                                                               | 3.19 +/- 2.98                                                               |
| MDS-UPDRS III, sum [mean +/- standard deviation]                                                                       |   | 1.54 +/- 2.8    | 29.69 +/- 13.58                                                              | 3.76 +/- 3.24                                                               |
| MDS-UPDRS IV, sum [mean +/- standard deviation]                                                                        |   | 0 +/- 0         | 1.06 +/- 1.81                                                                | 0 +/- 0                                                                     |
| MDS-UPDRS, sum [mean +/- standard deviation]                                                                           |   | 8.47 +/- 7.76   | 55.62 +/- 24.84                                                              | 18.81 +/- 9.35                                                              |
| <b>Non-motor symptoms</b>                                                                                              |   |                 |                                                                              |                                                                             |
| MDS-UPDRS I, sum [mean +/- standard deviation]                                                                         |   | 5.46 +/- 4.3    | 11.72 +/- 7.22                                                               | 11.86 +/- 6                                                                 |
| MDS-UPDRS anxiety (Question I.4) [mean +/- standard deviation]                                                         |   | 0.23 +/- 0.53   | 0.67 +/- 0.84                                                                | 1.05 +/- 0.97                                                               |
| MDS-UPDRS pain (Question I.9) [mean +/- standard deviation]                                                            |   | 0.69 +/- 0.83   | 1.28 +/- 1.12                                                                | 0.9 +/- 0.7                                                                 |
| MDS-UPDRS constipation (Question I.11) [mean +/- standard deviation]                                                   |   | 0.27 +/- 0.7    | 1.23 +/- 1.13                                                                | 0.95 +/- 1.2                                                                |
| Scopa-AUT, sum [mean +/- standard deviation]                                                                           |   | 8.37 +/- 5.67   | 13.09 +/- 7.09                                                               | 12.38 +/- 5.45                                                              |
| Scopa-AUT gastrointestinal part (Questions 1-7), sum [mean +/- standard deviation]                                     |   | 0.91 +/- 1.11   | 3.18 +/- 2.36                                                                | 3 +/- 1.97                                                                  |
|                                                                                                                        |   |                 | often:4 (5%);<br>regularly:2 (3%);<br>sometimes:25 (34%);<br>never:43 (58%); | often:1 (5%);<br>regularly:1 (5%);<br>sometimes:9 (43%);<br>never:10 (48%); |
| Scopa-AUT constipation (Question 5)                                                                                    |   | never:71 (91%)  | 2 n.d.                                                                       | never:10 (48%);                                                             |
| NMS-Quest constipation (Question 5), yes/no (%)                                                                        |   | 9/69 (12%)      | 38/38 (50%)                                                                  | 8/13 (38%)                                                                  |
| Non-motor symptom assessment scale (NMSS) constipation (Question 21, strength*frequency) [mean +/- standard deviation] |   | 0.04 +/- 0.25   | 0.45 +/- 1.52                                                                | 0.67 +/- 1.43                                                               |
| constipation by interview, N (%)                                                                                       |   | 1 (1%)          | 15 (20%)                                                                     | n.d.                                                                        |
| other GI dysfunction by interview, N (%)                                                                               |   | 17 (22%)        | 24 (32%)                                                                     | n.d.                                                                        |
| Beck depression inventory (BDI), sum [mean +/- standard deviation]                                                     |   | 3.71 +/- 4.47   | 7.35 +/- 5.92                                                                | 6.79 +/- 5.55                                                               |
| Geriatric Depression Scale (GDS), sum [mean +/- standard deviation]                                                    |   | 1.34 +/- 2.2    | 2.55 +/- 2.61                                                                | 2.62 +/- 2.36                                                               |
| Epworth Sleepiness Scale (ESS), sum [mean +/- standard deviation]                                                      |   | 6.02 +/- 3.69   | 7.86 +/- 3.84                                                                | 9.5 +/- 4.36                                                                |
| Mini-Mental-State-Examination (MMSE), total score [mean +/- standard deviation]                                        |   | 28.71 +/- 1.53  | 27.72 +/- 2.35                                                               | 28.67 +/- 0.86                                                              |
| Montreal Cognitive Assessment (MoCa), total score [mean +/- standard deviation]                                        |   | 26.1 +/- 2.73   | 24.32 +/- 4.2                                                                | 23.81 +/- 3.2                                                               |
| Montgomery-Asberg Depression Rating Scale (MADRS), sum [mean +/- standard deviation]                                   |   | 1.89 +/- 5.05   | 2.79 +/- 3.78                                                                | 5.24 +/- 6.14                                                               |
| RBD by polysomnography, N                                                                                              |   | 0               | 40; 6 n.d.                                                                   | 21                                                                          |
| Smell identification test (by 16 item Sniffin Sticks) [mean +/- standard deviation]                                    |   | 11.81 +/- 2.59  | 5.91 +/- 3.45                                                                | 6.4 +/- 3.93                                                                |
| <b>Intake of PD medication</b>                                                                                         |   |                 |                                                                              |                                                                             |
| Azilect, N (%)                                                                                                         |   | 0 (0%)          | 50 (66%)                                                                     | 0 (0%)                                                                      |
| any MAO-B inhibitors, N (%)                                                                                            |   | 0 (0%)          | 52 (68%)                                                                     | 0 (0%)                                                                      |
| Levodopa, N (%)                                                                                                        |   | 0 (0%)          | 66, (87%)                                                                    | 0 (0%)                                                                      |
| L-Dopa agonists, N (%)                                                                                                 |   | 0 (0%)          | 52 (68%)                                                                     | 0 (0%)                                                                      |
| COMT inhibitors, N (%)                                                                                                 |   | 0 (0%)          | 4 (5%)                                                                       | 0 (0%)                                                                      |
| OTHER: macrogol intake, N (%)                                                                                          |   | 1 (1%)          | 8 (11%)                                                                      | 0 (0%)                                                                      |
| <b>Medical history</b>                                                                                                 |   |                 |                                                                              |                                                                             |
| depression, N (%)                                                                                                      |   | 11 (14%)        | 7 (9%)                                                                       | 6 (29%)                                                                     |
| anxiety, N (%)                                                                                                         |   | 2 (3%)          | 4 (5%)                                                                       | 3, 1 n.d. (15%)                                                             |
| sleep apnoe, N (%)                                                                                                     |   | 8 (10%)         | 2 (3%)                                                                       | 3 (14%)                                                                     |
| periodic limb movement disorder, N (%)                                                                                 |   | 0 (0%)          | 1 (1%)                                                                       | 1 (5%)                                                                      |
| hypertension, N (%)                                                                                                    |   | 36 (46%)        | 43 (56%)                                                                     | 10 (48%)                                                                    |
| hyperlipidemia, N (%)                                                                                                  |   | 46 (59%)        | 31 (41%)                                                                     | 7 (33%)                                                                     |
| diabetes mellitus, N (%)                                                                                               |   | 4 (5%)          | 6 (8%)                                                                       | 3 (14%)                                                                     |
| osteoarthritis, N (%)                                                                                                  |   | 37 (47%)        | 19 (25%)                                                                     | 11 (52%)                                                                    |
| rheumatoid arthritis, N (%)                                                                                            |   | 1 (1%)          | 6 (8%)                                                                       | 0 (0%)                                                                      |
| coronary artery disease, N (%)                                                                                         |   | 2 (3%)          | 8 (11%)                                                                      | 2 (10%)                                                                     |
| congestive heart disease, N (%)                                                                                        |   | 2 (3%)          | 3 (4%)                                                                       | 1 (5%)                                                                      |
| hypothyroidism, N (%)                                                                                                  |   | 7 (9%)          | 7 (9%)                                                                       | 3 (14%)                                                                     |
| asthma/COPD, N (%)                                                                                                     |   | 9 (12%)         | 6 (8%)                                                                       | 5 (24%)                                                                     |
| cancer, N (%)                                                                                                          |   | 4 (5%)          | 5 (7%)                                                                       | 0 (0%)                                                                      |
| antidepressant intake, N (%)                                                                                           |   | 5, 1 n.d. (6%)  | 5 (7%)                                                                       | 0 (0%)                                                                      |
| current diabetes and/or metformin intake, N (%)                                                                        |   | 6 (8%)          | 7 (9%)                                                                       | 3 (14%)                                                                     |
| metformin intake, N (%)                                                                                                |   | 3 (4%)          | 4 (5%)                                                                       | 3 (14%)                                                                     |

Characteristics of the cohort with nasal wash samples

| Study group                                                                                                                   |                                                                                      | HC<br>65                                             | PD<br>70                                                  | iRBD<br>12                           |
|-------------------------------------------------------------------------------------------------------------------------------|--------------------------------------------------------------------------------------|------------------------------------------------------|-----------------------------------------------------------|--------------------------------------|
| <b>Demographics</b>                                                                                                           | N                                                                                    |                                                      |                                                           |                                      |
|                                                                                                                               | Male/female (% male)                                                                 | 36/29 (55%)                                          | 47/23 (67%)                                               | 7/5 (58%)                            |
|                                                                                                                               | age, years [mean +/- standard deviation]                                             | 68.32 +/- 6.28                                       | 68.14 +/- 10.06                                           | 68 +/- 7.32                          |
| <b>Anthropometrics</b>                                                                                                        |                                                                                      |                                                      |                                                           |                                      |
|                                                                                                                               | weight, kg [mean +/- standard deviation]                                             | 80.31 +/- 16.36                                      | 83.59 +/- 15.58                                           | 79.54 +/- 16.14                      |
|                                                                                                                               | height, cm [mean +/- standard deviation]                                             | 172.89 +/- 8.56                                      | 171.64 +/- 9.69                                           | 172.17 +/- 10.94                     |
|                                                                                                                               | BMI, kg/(m*m) [mean +/- standard deviation]                                          | 26.71 +/- 4.26                                       | 28.34 +/- 4.44                                            | 26.65 +/- 3.48                       |
| <b>Motor Symptoms</b>                                                                                                         |                                                                                      |                                                      |                                                           |                                      |
|                                                                                                                               | Hoehn and Yahr staging [mean +/- standard deviation]                                 | 0 +/- 0                                              | 2.16 +/- 0.82                                             | 0.08 +/- 0.29                        |
|                                                                                                                               | MDS-UPDRS II, sum [mean +/- standard deviation]                                      | 1.45 +/- 1.93                                        | 13.54 +/- 7.56                                            | 3.08 +/- 3.09                        |
|                                                                                                                               | MDS-UPDRS III, sum [mean +/- standard deviation]                                     | 1.62 +/- 2.72                                        | 29.99 +/- 13.91                                           | 3.83 +/- 3.38                        |
|                                                                                                                               | MDS-UPDRS IV, sum [mean +/- standard deviation]                                      | 0 +/- 0                                              | 1.12 +/- 1.87                                             | 0 +/- 0                              |
|                                                                                                                               | MDS-UPDRS, sum [mean +/- standard deviation]                                         | 8.6 +/- 7.75                                         | 56.35 +/- 25.5                                            | 17.17 +/- 9.79                       |
| <b>Non-motor symptoms</b>                                                                                                     |                                                                                      |                                                      |                                                           |                                      |
|                                                                                                                               | MDS-UPDRS I, sum [mean +/- standard deviation]                                       | 5.54 +/- 4.49                                        | 11.71 +/- 7.36                                            | 10.25 +/- 5.03                       |
|                                                                                                                               | MDS-UPDRS anxiety (Question I.4) [mean +/- standard deviation]                       | 0.28 +/- 0.57                                        | 0.64 +/- 0.82                                             | 0.92 +/- 1                           |
|                                                                                                                               | MDS-UPDRS pain (Question I.9) [mean +/- standard deviation]                          | 0.68 +/- 0.85                                        | 1.26 +/- 1.13                                             | 0.83 +/- 0.72                        |
|                                                                                                                               | MDS-UPDRS constipation (Question I.11) [mean +/- standard deviation]                 | 0.31 +/- 0.75                                        | 1.26 +/- 1.13                                             | 0.5 +/- 0.9                          |
|                                                                                                                               | Scopa-AUT, sum [mean +/- standard deviation]                                         | 8.72 +/- 5.67                                        | 13.05 +/- 7.29                                            | 10.42 +/- 4.72                       |
|                                                                                                                               | Scopa-AUT gastrointestinal part (Questions 1-7), sum [mean +/- standard deviation]   | 0.98 +/- 1.17                                        | 3.14 +/- 2.35                                             | 2.08 +/- 1.51                        |
|                                                                                                                               |                                                                                      |                                                      | often:4 (6%);<br>regularly:1 (1%);<br>sometimes:25 (37%); |                                      |
|                                                                                                                               |                                                                                      | often:2 (3%);<br>sometimes:4 (6%);<br>never:59 (91%) | never:38 (56%);<br>2 n.d.                                 | sometimes:4 (33%);<br>never:8 (67%); |
|                                                                                                                               | Scopa-AUT constipation (Question 5)                                                  | 9/56 (16%)                                           | 36/34 (51%)                                               | 3/9 (25%)                            |
|                                                                                                                               | NMS-Quest constipation (Question 5), yes/no (%)                                      | 0.05 +/- 0.28                                        | 0.49 +/- 1.58                                             | 0.67 +/- 1.56                        |
| <b>Non-motor symptom assessment scale (NMSS) constipation (Question 21, strength*frequency) [mean +/- standard deviation]</b> |                                                                                      |                                                      |                                                           |                                      |
|                                                                                                                               | constipation by interview, N (%)                                                     | 1 (2%)                                               | 13 (19%)                                                  | n.d.                                 |
|                                                                                                                               | other GI dysfunction by interview, N (%)                                             | 16 (25%)                                             | 23 (33%)                                                  | n.d.                                 |
|                                                                                                                               | Beck depression inventory (BDI), sum [mean +/- standard deviation]                   | 3.89 +/- 4.77                                        | 7.17 +/- 5.7                                              | 5.25 +/- 4.64                        |
|                                                                                                                               | Geriatric Depression Scale (GDS), sum [mean +/- standard deviation]                  | 1.44 +/- 2.35                                        | 2.55 +/- 2.67                                             | 1.76 +/- 1.43                        |
|                                                                                                                               | Epworth Sleepiness Scale (ESS), sum [mean +/- standard deviation]                    | 6.15 +/- 3.83                                        | 7.72 +/- 3.71                                             | n.d.                                 |
|                                                                                                                               | Mini-Mental-State-Examination (MMSE), total score [mean +/- standard deviation]      | 28.71 +/- 1.53                                       | 27.72 +/- 2.35                                            | 28.67 +/- 0.86                       |
|                                                                                                                               | Montreal Cognitive Assessment (MoCa), total score [mean +/- standard deviation]      | 26.02 +/- 2.48                                       | 24.21 +/- 4.29                                            | 23.33 +/- 3.68                       |
|                                                                                                                               | Montgomery-Åsberg Depression Rating Scale (MADRS), sum [mean +/- standard deviation] | 1.97 +/- 5.46                                        | 2.74 +/- 3.66                                             | 3.25 +/- 3.19                        |
|                                                                                                                               | RBD by polysomnography, N                                                            | 0                                                    | 37; 5 n.d.                                                | 12                                   |
|                                                                                                                               | Smell identification test (by 16 item Sniffin Sticks) [mean +/- standard deviation]  | 11.88 +/- 2.56                                       | 5.8 +/- 3.52                                              | 7 +/- 3.22                           |
| <b>Intake of PD medication</b>                                                                                                |                                                                                      |                                                      |                                                           |                                      |
|                                                                                                                               | Azilect, N (%)                                                                       | 0 (0%)                                               | 44 (63%)                                                  | 0 (0%)                               |
|                                                                                                                               | any MAO-B inhibitors, N (%)                                                          | 0 (0%)                                               | 46 (66%)                                                  | 0 (0%)                               |
|                                                                                                                               | Levodopa, N (%)                                                                      | 0 (0%)                                               | 62, (89%)                                                 | 0 (0%)                               |
|                                                                                                                               | L-Dopa agonists, N (%)                                                               | 0 (0%)                                               | 46 (66%)                                                  | 0 (0%)                               |
|                                                                                                                               | COMT inhibitors, N (%)                                                               | 0 (0%)                                               | 4 (6%)                                                    | 0 (0%)                               |
|                                                                                                                               | OTHER: macrogol intake, N (%)                                                        | 1 (2%)                                               | 7 (10%)                                                   | 0 (0%)                               |
| <b>Medical history</b>                                                                                                        |                                                                                      |                                                      |                                                           |                                      |
|                                                                                                                               | depression, N (%)                                                                    | 11 (17%)                                             | 7 (10%)                                                   | 1 (8%)                               |
|                                                                                                                               | anxiety, N (%)                                                                       | 2 (3%)                                               | 4 (6%)                                                    | 0, 1 n.d. (0%)                       |
|                                                                                                                               | sleep apnoe, N (%)                                                                   | 7 (11%)                                              | 2 (3%)                                                    | 2 (17%)                              |
|                                                                                                                               | periodic limb movement disorder, N (%)                                               | 0 (0%)                                               | 1 (1%)                                                    | 1 (8%)                               |
|                                                                                                                               | hypertension, N (%)                                                                  | 30 (46%)                                             | 39 (56%)                                                  | 6 (50%)                              |
|                                                                                                                               | hyperlipidemia, N (%)                                                                | 39 (60%)                                             | 28 (40%)                                                  | 3 (25%)                              |
|                                                                                                                               | diabetes mellitus, N (%)                                                             | 4 (6%)                                               | 6 (9%)                                                    | 2 (17%)                              |
|                                                                                                                               | osteoarthritis, N (%)                                                                | 34 (52%)                                             | 18 (26%)                                                  | 8 (67%)                              |
|                                                                                                                               | rheumatoid arthritis, N (%)                                                          | 1 (2%)                                               | 6 (9%)                                                    | 0 (0%)                               |
|                                                                                                                               | coronary artery disease, N (%)                                                       | 2 (3%)                                               | 6 (9%)                                                    | 1 (8%)                               |
|                                                                                                                               | congestive heart disease, N (%)                                                      | 2 (3%)                                               | 3 (4%)                                                    | 1 (8%)                               |
|                                                                                                                               | hypothyroidism, N (%)                                                                | 7 (6%)                                               | 5 (7%)                                                    | 3 (25%)                              |
|                                                                                                                               | asthma/COPD, N (%)                                                                   | 9 (14%)                                              | 6 (9%)                                                    | 3 (25%)                              |
|                                                                                                                               | cancer, N (%)                                                                        | 4 (6%)                                               | 5 (7%)                                                    | 0, 2 n.d. (0%)                       |
|                                                                                                                               | antidepressant intake, N (%)                                                         | 5, 1 n.d. (6%)                                       | 5 (7%)                                                    | 0 (0%)                               |
|                                                                                                                               | current diabetes and/or metformin intake, N (%)                                      | 6 (9%)                                               | 6 (9%)                                                    | 2 (17%)                              |
|                                                                                                                               | metformin intake, N (%)                                                              | 3 (5%)                                               | 3 (4%)                                                    | 2 (17%)                              |

Characteristics of the cohort with stool samples analyzed by 16S rRNA gene amplicon sequencing

| Study group                    |                                                                                      | HC                                                    | PD                                                   | iRBD                                                                      |
|--------------------------------|--------------------------------------------------------------------------------------|-------------------------------------------------------|------------------------------------------------------|---------------------------------------------------------------------------|
|                                | N                                                                                    | 38                                                    | 26                                                   | 20                                                                        |
| <b>Demographics</b>            |                                                                                      |                                                       |                                                      |                                                                           |
|                                | Male/female (% male)                                                                 | 25/13 (66%)                                           | 19/7 (73%)                                           | 12/8 (60%)                                                                |
|                                | age, years [mean +/- standard deviation]                                             | 69.84 +/- 6.6                                         | 65.96 +/- 8.01                                       | 66.05 +/- 8.13                                                            |
| <b>Anthropometrics</b>         |                                                                                      |                                                       |                                                      |                                                                           |
|                                | weight, kg [mean +/- standard deviation]                                             | 80.55 +/- 14.92                                       | 85.09 +/- 13.69                                      | 78.76 +/- 14.22                                                           |
|                                | height, cm [mean +/- standard deviation]                                             | 172.55 +/- 8.92                                       | 173.17 +/- 9.19                                      | 172.75 +/- 10.17                                                          |
|                                | BMI, kg/(m <sup>2</sup> m) [mean +/- standard deviation]                             | 26.9 +/- 3.68                                         | 28.47 +/- 4.05                                       | 26.3 +/- 3.46                                                             |
| <b>Motor Symptoms</b>          |                                                                                      |                                                       |                                                      |                                                                           |
|                                | Hoehn and Yahr staging [mean +/- standard deviation]                                 | 0 +/- 0                                               | 2 +/- 0.58                                           | 0.05 +/- 0.22                                                             |
|                                | MDS-UPDRS II, sum [mean +/- standard deviation]                                      | 1.42 +/- 1.93                                         | 11.38 +/- 5.39                                       | 3.35 +/- 2.96                                                             |
|                                | MDS-UPDRS III, sum [mean +/- standard deviation]                                     | 1.5 +/- 2.83                                          | 27.46 +/- 11.81                                      | 3.95 +/- 3.2                                                              |
|                                | MDS-UPDRS IV, sum [mean +/- standard deviation]                                      | 0 +/- 0                                               | 0.69 +/- 1.26                                        | 0 +/- 0                                                                   |
|                                | MDS-UPDRS, sum [mean +/- standard deviation]                                         | 8.97 +/- 7.33                                         | 49.81 +/- 20.11                                      | 19.55 +/- 8.94                                                            |
| <b>Non-motor symptoms</b>      |                                                                                      |                                                       |                                                      |                                                                           |
|                                | MDS-UPDRS I, sum [mean +/- standard deviation]                                       | 6.05 +/- 4.05                                         | 10.27 +/- 6.35                                       | 12.25 +/- 5.87                                                            |
|                                | MDS-UPDRS anxiety (Question I.4) [mean +/- standard deviation]                       | 0.26 +/- 0.6                                          | 0.5 +/- 0.76                                         | 1.1 +/- 0.97                                                              |
|                                | MDS-UPDRS pain (Question I.9) [mean +/- standard deviation]                          | 0.68 +/- 0.77                                         | 1.08 +/- 1.2                                         | 0.95 +/- 0.69                                                             |
|                                | MDS-UPDRS constipation (Question I.11) [mean +/- standard deviation]                 | 0.32 +/- 0.77                                         | 0.77 +/- 0.95                                        | 1 +/- 1.21                                                                |
|                                | Scopa-AUT, sum [mean +/- standard deviation]                                         | 7.58 +/- 5.58                                         | 13 +/- 6.41                                          | 12.3 +/- 5.58                                                             |
|                                | Scopa-AUT gastrointestinal part (Questions 1-7), sum [mean +/- standard deviation]   | 0.82 +/- 1.09                                         | 3.16 +/- 2.36                                        | 3.1 +/- 1.97                                                              |
|                                |                                                                                      | often:2 (5%);<br>sometimes:4 (11%);<br>never:32 (84%) | often:1 (4%);<br>regularly:1 (4%);<br>never:16 (62%) | often:1 (5%);<br>regularly:1 (5%);<br>never:9 (45%);<br>sometimes:9 (45%) |
|                                | Scopa-AUT constipation (Question 5)                                                  | 4/34 (11%)                                            | 11/15 (42%)                                          | 8/12 (40%)                                                                |
|                                | NMS-Quest constipation (Question 5), yes/no (%)                                      | 0.08 +/- 0.36                                         | 0 +/- 0                                              | 0.7 +/- 1.45                                                              |
|                                | constipation by interview, N (%)                                                     | 1 (3%)                                                | 4 (15%)                                              | n.d.                                                                      |
|                                | other GI dysfunction by interview, N (%)                                             | 6 (16%)                                               | 8 (33%)                                              | n.d.                                                                      |
|                                | Beck depression inventory (BDI), sum [mean +/- standard deviation]                   | 2.95 +/- 3.02                                         | 6.76 +/- 7.01                                        | 6.47 +/- 5.51                                                             |
|                                | Geriatric Depression Scale (GDS), sum [mean +/- standard deviation]                  | 1.11 +/- 1.54                                         | 2.53 +/- 2.57                                        | 2.55 +/- 2.4                                                              |
|                                | Epworth Sleepiness Scale (ESS), sum [mean +/- standard deviation]                    | 5.56 +/- 3.21                                         | 8.27 +/- 3.69                                        | 9.5 +/- 4.36                                                              |
|                                | Mini-Mental-State-Examination (MMSE), total score [mean +/- standard deviation]      | 28.5 +/- 1.91                                         | 28.5 +/- 1.7                                         | 28.75 +/- 0.79                                                            |
|                                | Montreal Cognitive Assessment (MoCa), total score [mean +/- standard deviation]      | 25.76 +/- 3.03                                        | 25.46 +/- 3.54                                       | 23.75 +/- 3.27                                                            |
|                                | Montgomery-Åsberg Depression Rating Scale (MADRS), sum [mean +/- standard deviation] | 1.69 +/- 4.6                                          | 3.19 +/- 4.31                                        | 5.15 +/- 6.29                                                             |
|                                | RBD by polysomnography, N                                                            | 0                                                     | 13; 2 n.d.                                           | 20                                                                        |
|                                | Smell identification test (by 16 item Sniffin Sticks) [mean +/- standard deviation]  | 11.5 +/- 2.86                                         | 5.35 +/- 2.99                                        | 6.21 +/- 3.94                                                             |
| <b>Intake of PD medication</b> |                                                                                      |                                                       |                                                      |                                                                           |
|                                | Azilect, N (%)                                                                       | 0 (0%)                                                | 20 (77%)                                             | 0 (0%)                                                                    |
|                                | any MAO-B inhibitors, N (%)                                                          | 0 (0%)                                                | 21 (81%)                                             | 0 (0%)                                                                    |
|                                | Levodopa, N (%)                                                                      | 0 (0%)                                                | 20, (77%)                                            | 0 (0%)                                                                    |
|                                | L-Dopa agonists, N (%)                                                               | 0 (0%)                                                | 22 (85%)                                             | 0 (0%)                                                                    |
|                                | COMT inhibitors, N (%)                                                               | 0 (0%)                                                | 1 (4%)                                               | 0 (0%)                                                                    |
|                                | OTHER: macrogol intake, N (%)                                                        | 1 (3%)                                                | 2 (8%)                                               | 0 (0%)                                                                    |
| <b>Medical history</b>         |                                                                                      |                                                       |                                                      |                                                                           |
|                                | depression, N (%)                                                                    | 4 (11%)                                               | 0 (0%)                                               | 6 (30%)                                                                   |
|                                | anxiety, N (%)                                                                       | 0 (0%)                                                | 0 (0%)                                               | 3, 1 n.d. (16%)                                                           |
|                                | sleep apnoe, N (%)                                                                   | 6 (16%)                                               | 1 (4%)                                               | 3 (15%)                                                                   |
|                                | periodic limb movement disorder, N (%)                                               | 0 (0%)                                                | 0 (0%)                                               | 1 (5%)                                                                    |
|                                | hypertension, N (%)                                                                  | 18 (47%)                                              | 12 (46%)                                             | 10 (50%)                                                                  |
|                                | hyperlipidemia, N (%)                                                                | 23 (61%)                                              | 7 (27%)                                              | 7 (35%)                                                                   |
|                                | diabetes mellitus, N (%)                                                             | 3 (8%)                                                | 0 (0%)                                               | 3 (15%)                                                                   |
|                                | osteoarthritis, N (%)                                                                | 14 (37%)                                              | 3 (12%)                                              | 10 (50%)                                                                  |
|                                | rheumatoid arthritis, N (%)                                                          | 1 (3%)                                                | 2 (8%)                                               | 0 (0%)                                                                    |
|                                | coronary artery disease, N (%)                                                       | 1 (3%)                                                | 2 (8%)                                               | 2 (10%)                                                                   |
|                                | congestive heart disease, N (%)                                                      | 2 (5%)                                                | 2 (8%)                                               | 1 (5%)                                                                    |
|                                | hypothyroidism, N (%)                                                                | 4 (11%)                                               | 3 (12%)                                              | 3 (15%)                                                                   |
|                                | asthma/COPD, N (%)                                                                   | 4 (11%)                                               | 0 (0%)                                               | 5 (25%)                                                                   |
|                                | cancer, N (%)                                                                        | 1 (3%)                                                | 0 (0%)                                               | 0 (0%)                                                                    |
|                                | antidepressant intake, N (%)                                                         | 2, 1 n.d. (6%)                                        | 1 (4%)                                               | 0 (0%)                                                                    |
|                                | current diabetes and/or metformin intake, N (%)                                      | 3 (8%)                                                | 1 (4%)                                               | 3 (15%)                                                                   |
|                                | metformin intake, N (%)                                                              | 1 (3%)                                                | 1 (4%)                                               | 3 (15%)                                                                   |

Characteristics of the cohort with stool samples analyzed by 18S rRNA gene amplicon sequencing

| Study group                                                                                                            | N | HC<br>32        | PD<br>14                                                                  | iRBD<br>15                                                                 |
|------------------------------------------------------------------------------------------------------------------------|---|-----------------|---------------------------------------------------------------------------|----------------------------------------------------------------------------|
| <b>Demographics</b>                                                                                                    |   |                 |                                                                           |                                                                            |
| Male/female (% male)                                                                                                   |   | 20/12 (63%)     | 10/4 (71%)                                                                | 9/6 (50%)                                                                  |
| age, years [mean +/- standard deviation]                                                                               |   | 69.31 +/- 5.9   | 65.43 +/- 6.57                                                            | 65.87 +/- 7.86                                                             |
| <b>Anthropometrics</b>                                                                                                 |   |                 |                                                                           |                                                                            |
| weight, kg [mean +/- standard deviation]                                                                               |   | 79.89 +/- 14.92 | 84.27 +/- 13.42                                                           | 81.75 +/- 14.74                                                            |
| height, cm [mean +/- standard deviation]                                                                               |   | 173.12 +/- 8.43 | 173.61 +/- 10.66                                                          | 173.73 +/- 11.1                                                            |
| BMI, kg/(m <sup>2</sup> ) [mean +/- standard deviation]                                                                |   | 26.51 +/- 3.77  | 28 +/- 4.12                                                               | 27.02 +/- 3.69                                                             |
| <b>Motor Symptoms</b>                                                                                                  |   |                 |                                                                           |                                                                            |
| Hoehn and Yahr staging [mean +/- standard deviation]                                                                   |   | 0 +/- 0         | 2.04 +/- 0.66                                                             | 0.07 +/- 0.26                                                              |
| MDS-UPDRS II, sum [mean +/- standard deviation]                                                                        |   | 1.16 +/- 1.55   | 10.29 +/- 4.87                                                            | 3.27 +/- 2.55                                                              |
| MDS-UPDRS III, sum [mean +/- standard deviation]                                                                       |   | 1.34 +/- 2.39   | 26.93 +/- 12.72                                                           | 3.67 +/- 3.31                                                              |
| MDS-UPDRS IV, sum [mean +/- standard deviation]                                                                        |   | 0 +/- 0         | 0.93 +/- 1.49                                                             | 0 +/- 0                                                                    |
| MDS-UPDRS, sum [mean +/- standard deviation]                                                                           |   | 8.59 +/- 6.67   | 48.57 +/- 21.06                                                           | 19.6 +/- 8.85                                                              |
| <b>Non-motor symptoms</b>                                                                                              |   |                 |                                                                           |                                                                            |
| MDS-UPDRS I, sum [mean +/- standard deviation]                                                                         |   | 6.09 +/- 4.21   | 10.43 +/- 7.23                                                            | 12.67 +/- 5.89                                                             |
| MDS-UPDRS anxiety (Question I.4) [mean +/- standard deviation]                                                         |   | 0.28 +/- 0.63   | 0.64 +/- 0.84                                                             | 1.2 +/- 0.86                                                               |
| MDS-UPDRS pain (Question I.9) [mean +/- standard deviation]                                                            |   | 0.75 +/- 0.8    | 0.93 +/- 1.27                                                             | 1.07 +/- 0.59                                                              |
| MDS-UPDRS constipation (Question I.11) [mean +/- standard deviation]                                                   |   | 0.38 +/- 0.83   | 0.86 +/- 1.03                                                             | 1 +/- 1.2                                                                  |
| Scopa-AUT, sum [mean +/- standard deviation]                                                                           |   | 7.72 +/- 5.85   | 13.18 +/- 6.29                                                            | 12.27 +/- 6.31                                                             |
| Scopa-AUT gastrointestinal part (Questions 1-7), sum [mean +/- standard deviation]                                     |   | 0.84 +/- 1.14   | 3.08 +/- 2.5                                                              | 3.33 +/- 2.16                                                              |
|                                                                                                                        |   |                 | regularly:1 (8%);<br>often:2 (6%);<br>sometimes:3 (9%);<br>never:27 (84%) | often:1 (7%);<br>regularly:1 (7%);<br>sometimes:7 (47%);<br>never:6 (40%); |
| Scopa-AUT constipation (Question 5)                                                                                    |   | never:27 (84%)  | 1 n.d.                                                                    | never:6 (40%);                                                             |
| NMS-Quest constipation (Question 5), yes/no (%)                                                                        |   | 4/28 (13%)      | 6/8 (43%)                                                                 | 7/8 (47%)                                                                  |
| Non-motor symptom assessment scale (NMSS) constipation (Question 21, strength*frequency) [mean +/- standard deviation] |   | 0.09 +/- 0.39   | 0 +/- 0                                                                   | 0.67 +/- 1.4                                                               |
| constipation by interview, N (%)                                                                                       |   | 1 (3%)          | 2 (14%)                                                                   | n.d.                                                                       |
| other GI dysfunction by interview, N (%)                                                                               |   | 6 (19%)         | 4 (29%)                                                                   | n.d.                                                                       |
| Beck depression inventory (BDI), sum [mean +/- standard deviation]                                                     |   | 3.1 +/- 3.16    | 7.67 +/- 7.89                                                             | 6.37 +/- 6.26                                                              |
| Geriatric Depression Scale (GDS), sum [mean +/- standard deviation]                                                    |   | 1.1 +/- 1.51    | 3.26 +/- 3.13                                                             | 2.94 +/- 2.61                                                              |
| Epworth Sleepiness Scale (ESS), sum [mean +/- standard deviation]                                                      |   | 5.62 +/- 3.17   | 8.36 +/- 3.1                                                              | 9.5 +/- 4.36                                                               |
| Mini-Mental-State-Examination (MMSE), total score [mean +/- standard deviation]                                        |   | 28.91 +/- 1.38  | 28.57 +/- 2.03                                                            | 28.67 +/- 0.82                                                             |
| Montreal Cognitive Assessment (MoCa), total score [mean +/- standard deviation]                                        |   | 26.19 +/- 2.26  | 25 +/- 3.74                                                               | 23.33 +/- 3.39                                                             |
| Montgomery-Åsberg Depression Rating Scale (MADRS), sum [mean +/- standard deviation]                                   |   | 1.87 +/- 4.92   | 3.5 +/- 4.82                                                              | 6.53 +/- 6.67                                                              |
| RBD by polysomnography, N                                                                                              |   | 0               | 9; 1 n.d.                                                                 | 15                                                                         |
| Smell identification test (by 16 item Sniffin Sticks) [mean +/- standard deviation]                                    |   | 11.47 +/- 2.66  | 5.43 +/- 2.98                                                             | 5.86 +/- 3.84                                                              |
| <b>Intake of PD medication</b>                                                                                         |   |                 |                                                                           |                                                                            |
| Azilect, N (%)                                                                                                         |   | 0 (0%)          | 9 (64%)                                                                   | 0 (0%)                                                                     |
| any MAO-B inhibitors, N (%)                                                                                            |   | 0 (0%)          | 10 (71%)                                                                  | 0 (0%)                                                                     |
| Levodopa, N (%)                                                                                                        |   | 0 (0%)          | 12 (86%)                                                                  | 0 (0%)                                                                     |
| L-Dopa agonists, N (%)                                                                                                 |   | 0 (0%)          | 12 (86%)                                                                  | 0 (0%)                                                                     |
| COMT inhibitors, N (%)                                                                                                 |   | 0 (0%)          | 1 (7%)                                                                    | 0 (0%)                                                                     |
| OTHER: macrogol intake, N (%)                                                                                          |   | 1 (3%)          | 2 (14%)                                                                   | 0 (0%)                                                                     |
| <b>Medical history</b>                                                                                                 |   |                 |                                                                           |                                                                            |
| depression, N (%)                                                                                                      |   | 4 (13%)         | 0 (0%)                                                                    | 4 (27%)                                                                    |
| anxiety, N (%)                                                                                                         |   | 0 (0%)          | 0 (0%)                                                                    | 2, 1 n.d. (14%)                                                            |
| sleep apnoe, N (%)                                                                                                     |   | 4 (13%)         | 0 (0%)                                                                    | 3 (20%)                                                                    |
| periodic limb movement disorder, N (%)                                                                                 |   | 0 (0%)          | 0 (0%)                                                                    | 1 (7%)                                                                     |
| hypertension, N (%)                                                                                                    |   | 14 (44%)        | 5 (36%)                                                                   | 6 (40%)                                                                    |
| hyperlipidemia, N (%)                                                                                                  |   | 20 (63%)        | 3 (21%)                                                                   | 4 (27%)                                                                    |
| diabetes mellitus, N (%)                                                                                               |   | 2 (6%)          | 0 (0%)                                                                    | 1 (7%)                                                                     |
| osteoarthritis, N (%)                                                                                                  |   | 14 (44%)        | 2 (14%)                                                                   | 7 (47%)                                                                    |
| rheumatoid arthritis, N (%)                                                                                            |   | 1 (3%)          | 2 (14%)                                                                   | 0 (0%)                                                                     |
| coronary artery disease, N (%)                                                                                         |   | 1 (3%)          | 0 (0%)                                                                    | 1 (7%)                                                                     |
| congestive heart disease, N (%)                                                                                        |   | 2 (6%)          | 1 (7%)                                                                    | 1 (7%)                                                                     |
| hypothyroidism, N (%)                                                                                                  |   | 3 (9%)          | 2 (14%)                                                                   | 3 (20%)                                                                    |
| asthma/COPD, N (%)                                                                                                     |   | 3 (9%)          | 0 (0%)                                                                    | 4 (27%)                                                                    |
| cancer, N (%)                                                                                                          |   | 0 (0%)          | 0 (0%)                                                                    | 0 (0%)                                                                     |
| antidepressant intake, N (%)                                                                                           |   | 1, 1 n.d. (6%)  | 1 (7%)                                                                    | 0 (0%)                                                                     |
| current diabetes and/or metformin intake, N (%)                                                                        |   | 2 (6%)          | 1 (7%)                                                                    | 1 (7%)                                                                     |
| metformin intake, N (%)                                                                                                |   | 1 (3%)          | 1 (7%)                                                                    | 1 (7%)                                                                     |

comparison PD versus HC

| KEGG orthologous group | HC mean % abundan | greater median in | estimate of location parameter | P-Value (Wilcoxon rank sum test) | adjusted P-value | KEGG description                                                                                                                                                                                                                                     |
|------------------------|-------------------|-------------------|--------------------------------|----------------------------------|------------------|------------------------------------------------------------------------------------------------------------------------------------------------------------------------------------------------------------------------------------------------------|
| K13038                 | 0.069%            | HC                | -0.0049%                       | 0.004                            | 1.0              | dfp; fused 4'-phosphopantothenoylcysteine decarboxylase/phosphopantothenoylcysteine synthetase, FMN-binding (EC:4.1.1.36 6.3.2.5); K13038 phosphopantothenoylcysteine decarboxylase / phosphopantothenate--cysteine ligase [EC:4.1.1.36 6.3.2.5] (A) |
| K01749                 | 0.022%            | PD                | 0.0032%                        | 0.009                            | 1.0              | HMBS, PBG-D, PBGD, PORC, UPS; hydroxymethylbilane synthase (EC:2.5.1.61); K01749 hydroxymethylbilane synthase [EC:2.5.1.61] (A)                                                                                                                      |
| K01845                 | 0.032%            | PD                | 0.0019%                        | 0.006                            | 1.0              | GSA2; glutamate-1-semialdehyde 2,1-aminomutase 2; K01845 glutamate-1-semialdehyde 2,1-aminomutase [EC:5.4.3.8] (A)                                                                                                                                   |
| K00925                 | 0.078%            | HC                | 0.0005%                        | 0.007                            | 1.0              | similar to acetate kinase; K00925 acetate kinase [EC:2.7.2.1] (A)                                                                                                                                                                                    |
| K02492                 | 0.025%            | PD                | 0.0042%                        | 0.004                            | 1.0              | HEMA2; glutamyl-tRNA reductase 2; K02492 glutamyl-tRNA reductase [EC:1.2.1.70] (A)                                                                                                                                                                   |
| K09812                 | 0.073%            | HC                | -0.0057%                       | 0.005                            | 1.0              | ftsE; predicted transporter subunit: ATP-binding component of ABC superfamily; K09812 cell division transport system ATP-binding protein (A)                                                                                                         |
| K06998                 | 0.013%            | PD                | 0.0027%                        | 0.007                            | 1.0              | PBLD, MAWBP, MAWDBP; phenazine biosynthesis-like protein domain containing; K06998 (A)                                                                                                                                                               |
| K02049                 | 0.027%            | PD                | 0.0034%                        | 0.004                            | 1.0              | putative ABC transporter; K02049 NitT/TauT family transport system ATP-binding protein (A)                                                                                                                                                           |
| K01607                 | 0.028%            | PD                | 0.0030%                        | 0.005                            | 1.0              | AO090038000029; 4-carboxymuconolactone decarboxylase; K01607 4-carboxymuconolactone decarboxylase [EC:4.1.1.44] (A)                                                                                                                                  |
| K00537                 | 0.011%            | PD                | 0.0027%                        | 0.003                            | 1.0              | arsenate reductase-like; K00537 arsenate reductase [EC:1.20.4.1] (A)                                                                                                                                                                                 |
| K03783                 | 0.065%            | HC                | 0.0004%                        | 0.009                            | 1.0              | PNP, NP, PRO1837, PUNP; purine nucleoside phosphorylase (EC:2.4.2.1); K03783 purine-nucleoside phosphorylase [EC:2.4.2.1] (A)                                                                                                                        |
| K02652                 | 0.019%            | PD                | 0.0033%                        | 0.004                            | 1.0              | pilus biogenesis protein; K02652 type IV pilus assembly protein PilB (A)                                                                                                                                                                             |
| K02669                 | 0.035%            | PD                | 0.0030%                        | 0.005                            | 1.0              | yggR; predicted pilus retraction ATPase; K02669 twitching motility protein PilT (A)                                                                                                                                                                  |
| K00100                 | 0.016%            | PD                | 0.0029%                        | 0.001                            | 1.0              | Akr1c6, 3alpha-HSD, Ak1c1, Hsd17b5; aldo-keto reductase family 1, member C6; K00100 [EC:1.1.1.-] (A)                                                                                                                                                 |
| K01966                 | 0.003%            | PD                | 0.0027%                        | 0.005                            | 1.0              | PCCB; propionyl CoA carboxylase, beta polypeptide (EC:6.4.1.3); K01966 propionyl-CoA carboxylase beta chain [EC:6.4.1.3] (A)                                                                                                                         |
| K01447                 | 0.007%            | PD                | 0.0060%                        | 0.007                            | 1.0              | N-acetylmuramoyl-L-alanine amidase; K01447 N-acetylmuramoyl-L-alanine amidase [EC:3.5.1.28] (A)                                                                                                                                                      |
| K00955                 | 0.008%            | PD                | 0.0018%                        | 0.001                            | 1.0              | nodQ; bifunctional sulfate adenyltransferase/adenyl-sulfate kinase (EC:2.7.1.25 2.7.7.4); K00955 bifunctional enzyme CysN/CysC [EC:2.7.7.4 2.7.1.25] (A)                                                                                             |
| K13542                 | 0.020%            | PD                | 0.0035%                        | 0.006                            | 1.0              | hemD; uroporphyrinogen III C2,C7-methyltransferase and uroporphyrinogen III synthase; K13542 uroporphyrinogen III methyltransferase / synthase [EC:2.1.1.107 4.2.1.75] (A)                                                                           |
| K07192                 | 0.018%            | PD                | 0.0008%                        | 0.009                            | 1.0              | FLOT1; flotillin 1; K07192 flotillin (A)                                                                                                                                                                                                             |
| K09940                 | 0.002%            | PD                | 0.0028%                        | 0.009                            | 1.0              | hypothetical protein; K09940 hypothetical protein (A)                                                                                                                                                                                                |
| K03818                 | 0.002%            | PD                | 0.0026%                        | 0.007                            | 1.0              | wcaF; predicted acyl transferase; K03818 putative colanic acid biosynthesis acetyltransferase WcaF [EC:2.3.1.-] (A)                                                                                                                                  |
| K16870                 | 0.000%            | PD                | 0.0000%                        | 0.007                            | 1.0              | N-acetylglucosaminyl-diphospho-decaprenol L-rhamnosyltransferase [EC:2.4.1.289]                                                                                                                                                                      |

**comparison iRBD versus HC**

| KEGG orthologous group | HC mean % abundan | greater median in | estimate of location parameter | P-Value (Wilcoxon rank sum test) | adjusted P-value | KEGG description                                                                                                                                                                                                                                                |
|------------------------|-------------------|-------------------|--------------------------------|----------------------------------|------------------|-----------------------------------------------------------------------------------------------------------------------------------------------------------------------------------------------------------------------------------------------------------------|
| K02863                 | 0.080%            | HC                | -0.0022%                       | 0.009                            | 0.4              | PRPL1; Plastid ribosomal protein L1 large ribosomal subunit; K02863 large subunit ribosomal protein L1 (A)                                                                                                                                                      |
| K02906                 | 0.080%            | HC                | -0.0022%                       | 0.009                            | 0.4              | 50S ribosomal protein L3-1; K02906 large subunit ribosomal protein L3 (A)                                                                                                                                                                                       |
| K02933                 | 0.072%            | HC                | -0.0014%                       | 0.007                            | 0.4              | emb2394; 50S ribosomal protein L6; K02933 large subunit ribosomal protein L6 (A)                                                                                                                                                                                |
| K02950                 | 0.080%            | HC                | -0.0022%                       | 0.008                            | 0.4              | rps12; ribosomal protein S12; K02950 small subunit ribosomal protein S12 (A)                                                                                                                                                                                    |
| K02967                 | 0.079%            | HC                | -0.0024%                       | 0.010                            | 0.4              | rps2; 30S ribosomal protein S2; K02967 small subunit ribosomal protein S2 (A)                                                                                                                                                                                   |
| K02996                 | 0.061%            | HC                | -0.0056%                       | 0.010                            | 0.4              | RPS9; 30S ribosomal protein S9; K02996 small subunit ribosomal protein S9 (A)                                                                                                                                                                                   |
| K01533                 | 0.080%            | HC                | -0.0008%                       | 0.008                            | 0.4              | ATP7A, DSMAX, MK, MNK, SMAX3; ATPase, Cu <sup>++</sup> transporting, alpha polypeptide (EC:3.6.3.4); K01533 Cu <sup>2+</sup> -exporting ATPase [EC:3.6.3.4] (A)                                                                                                 |
| K00600                 | 0.076%            | HC                | -0.0036%                       | 0.009                            | 0.4              | SHMT1, CSHMT, SHMT; serine hydroxymethyltransferase 1 (soluble) (EC:2.1.2.1); K00600 glycine hydroxymethyltransferase [EC:2.1.2.1] (A)                                                                                                                          |
| K00820                 | 0.082%            | HC                | -0.0031%                       | 0.005                            | 0.4              | GFPT1, GFA, GFAT, GFAT_1, GFAT1, GFAT1m, GFPT, GFPT1L, MSLG; glutamine--fructose-6-phosphate transaminase 1 (EC:2.6.1.16); K00820 glucosamine--fructose-6-phosphate aminotransferase (isomerizing) [EC:2.6.1.16] (A)                                            |
| K04077                 | 0.082%            | HC                | -0.0027%                       | 0.008                            | 0.4              | HSPD1, CPN60, GROEL, HLD4, HSP-60, HSP60, HSP65, HuCHA60, SPG13; heat shock 60kDa protein 1 (chaperonin); K04077 chaperonin GroEL (A)                                                                                                                           |
| K03168                 | 0.073%            | HC                | -0.0005%                       | 0.007                            | 0.4              | DNA topoisomerase-like protein (EC:5.99.1.2); K03168 DNA topoisomerase I [EC:5.99.1.2] (A)                                                                                                                                                                      |
| K00609                 | 0.080%            | HC                | -0.0026%                       | 0.007                            | 0.4              | PYRB; aspartate carbamoyltransferase; K00609 aspartate carbamoyltransferase catalytic subunit [EC:2.1.3.2] (A)                                                                                                                                                  |
| K04078                 | 0.082%            | HC                | -0.0026%                       | 0.003                            | 0.3              | HSPE1, CPN10, EPF, GROES, HSP10; heat shock 10kDa protein 1 (chaperonin 10); K04078 chaperonin GroES (A)                                                                                                                                                        |
| K00602                 | 0.084%            | HC                | -0.0037%                       | 0.003                            | 0.3              | ATIC, AICAR, AICARFT, IMPCHASE, PURH; 5-aminoimidazole-4-carboxamide ribonucleotide formyltransferase/IMP cyclohydrolase (EC:2.1.2.3 3.5.4.10); K00602 phosphoribosylaminoimidazolecarboxamide formyltransferase / IMP cyclohydrolase [EC:2.1.2.3 3.5.4.10] (A) |
| K02887                 | 0.080%            | HC                | -0.0023%                       | 0.010                            | 0.4              | rpl20; 50S ribosomal protein L20; K02887 large subunit ribosomal protein L20 (A)                                                                                                                                                                                |
| K02355                 | 0.127%            | HC                | -0.0047%                       | 0.009                            | 0.4              | GFM2, EF-G2mt, EFG2, MRRF2, MST027, RRF2, RRF2mt, hEFG2, mEF-G_2; G elongation factor, mitochondrial 2; K02355 elongation factor G (A)                                                                                                                          |
| K02358                 | 0.084%            | HC                | -0.0033%                       | 0.004                            | 0.4              | TUFM, COXPD4, EF-TuMT, EFTU, P43; Tu translation elongation factor, mitochondrial; K02358 elongation factor Tu (A)                                                                                                                                              |
| K02926                 | 0.079%            | HC                | -0.0023%                       | 0.010                            | 0.4              | RPL4; 50S ribosomal protein L4; K02926 large subunit ribosomal protein L4 (A)                                                                                                                                                                                   |
| K03086                 | 0.131%            | HC                | -0.0141%                       | 0.001                            | 0.3              | SIGA; sigma factor A; K03086 RNA polymerase primary sigma factor (A)                                                                                                                                                                                            |
| K03977                 | 0.079%            | HC                | -0.0023%                       | 0.009                            | 0.4              | GTPase Der-like; K03977 GTP-binding protein (A)                                                                                                                                                                                                                 |
| K01924                 | 0.081%            | HC                | -0.0021%                       | 0.004                            | 0.3              | murC; UDP-N-acetylmuramate:L-alanine ligase (EC:6.3.2.8); K01924 UDP-N-acetylmuramate--alanine ligase [EC:6.3.2.8] (A)                                                                                                                                          |
| K03723                 | 0.081%            | HC                | -0.0023%                       | 0.004                            | 0.3              | mfd; transcription-repair coupling factor; K03723 transcription-repair coupling factor (superfamily II helicase) [EC:3.6.4.-] (A)                                                                                                                               |
| K06997                 | 0.080%            | HC                | -0.0029%                       | 0.007                            | 0.4              | PROSC; proline synthetase co-transcribed homolog (bacterial); K06997 (A)                                                                                                                                                                                        |
| K02907                 | 0.078%            | HC                | -0.0010%                       | 0.007                            | 0.4              | large subunit ribosomal protein L30; K02907 large subunit ribosomal protein L30 (A)                                                                                                                                                                             |
| K02860                 | 0.081%            | HC                | -0.0024%                       | 0.004                            | 0.3              | RimM-like protein; K02860 16S rRNA processing protein RimM (A)                                                                                                                                                                                                  |
| K00817                 | 0.082%            | HC                | -0.0035%                       | 0.002                            | 0.3              | HISN6B; Histidinol-phosphate aminotransferase; K00817 histidinol-phosphate aminotransferase [EC:2.6.1.9] (A)                                                                                                                                                    |
| K01262                 | 0.089%            | HC                | -0.0023%                       | 0.001                            | 0.3              | XPNPEP3, APP3, NPHPL1; X-prolyl aminopeptidase (aminopeptidase P) 3, putative (EC:3.4.11.9); K01262 Xaa-Pro aminopeptidase [EC:3.4.11.9] (A)                                                                                                                    |
| K06287                 | 0.082%            | HC                | -0.0027%                       | 0.004                            | 0.4              | 1810009N02Rik; RIKEN cDNA 1810009N02 gene; K06287 septum formation protein (A)                                                                                                                                                                                  |
| K02013                 | 0.144%            | RBD               | 0.0055%                        | 0.003                            | 0.3              | fhuC; iron-hydroxamate transporter subunit; K02013 iron complex transport system ATP-binding protein [EC:3.6.3.34] (A)                                                                                                                                          |
| K06966                 | 0.049%            | HC                | -0.0082%                       | 0.004                            | 0.4              | LOG1; cytokinin riboside 5'-monophosphate phosphoribohydrolase LOG1; K06966 (A)                                                                                                                                                                                 |
| K02015                 | 0.189%            | RBD               | 0.0057%                        | 0.003                            | 0.3              | fhuB; fused iron-hydroxamate transporter subunits of ABC superfamily: membrane components; K02015 iron complex transport system permease protein (A)                                                                                                            |
| K00645                 | 0.082%            | HC                | -0.0029%                       | 0.006                            | 0.4              | MCAT, FASN2C, MCT, MT, NET62, fabD; malonyl CoA:ACP acyltransferase (mitochondrial) (EC:2.3.1.39); K00645 [acyl-carrier-protein] S-malonyltransferase [EC:2.3.1.39] (A)                                                                                         |
| K04485                 | 0.075%            | HC                | -0.0036%                       | 0.003                            | 0.3              | DNA repair protein RadA homolog; K04485 DNA repair protein RadA/Sms (A)                                                                                                                                                                                         |
| K01776                 | 0.066%            | HC                | -0.0046%                       | 0.003                            | 0.3              | murl; glutamate racemase (EC:5.1.1.3); K01776 glutamate racemase [EC:5.1.1.3] (A)                                                                                                                                                                               |
| K01652                 | 0.115%            | RBD               | 0.0053%                        | 0.006                            | 0.4              | similar to 2-hydroxyacyl-CoA lyase 1; K01652 acetolactate synthase I/II/III large subunit [EC:2.2.1.6] (A)                                                                                                                                                      |
| K00648                 | 0.083%            | HC                | -0.0052%                       | 0.004                            | 0.3              | KAS_III; 3-oxoacyl-[acyl-carrier-protein] synthase III; K00648 3-oxoacyl-[acyl-carrier-protein] synthase III [EC:2.3.1.180] (A)                                                                                                                                 |
| K01778                 | 0.090%            | RBD               | 0.0072%                        | 0.009                            | 0.4              | diaminopimelate epimerase; K01778 diaminopimelate epimerase [EC:5.1.1.7] (A)                                                                                                                                                                                    |
| K00640                 | 0.110%            | HC                | -0.0051%                       | 0.003                            | 0.3              | SERAT2;1; serine O-acetyltransferase; K00640 serine O-acetyltransferase [EC:2.3.1.30] (A)                                                                                                                                                                       |
| K01662                 | 0.088%            | HC                | -0.0054%                       | 0.001                            | 0.3              | DXPS1; 1-deoxy-D-xylulose 5-phosphate synthase 1; K01662 1-deoxy-D-xylulose-5-phosphate synthase [EC:2.2.1.7] (A)                                                                                                                                               |

|        |        |     |          |       |     |                                                                                                                                                                                                         |
|--------|--------|-----|----------|-------|-----|---------------------------------------------------------------------------------------------------------------------------------------------------------------------------------------------------------|
| K00759 | 0.058% | HC  | -0.0068% | 0.003 | 0.3 | APRT, AMP; adenine phosphoribosyltransferase (EC:2.4.2.7); K00759 adenine phosphoribosyltransferase [EC:2.4.2.7] (A)                                                                                    |
| K01897 | 0.108% | HC  | -0.0108% | 0.008 | 0.4 | ACSL1, ACS1, FAcl1, FAcl2, LACS, LACS1, LACS2; acyl-CoA synthetase long-chain family member 1 (EC:6.2.1.3); K01897 long-chain acyl-CoA synthetase [EC:6.2.1.3] (A)                                      |
| K00616 | 0.050% | RBD | 0.0038%  | 0.006 | 0.4 | TALDO1, TAL, TAL-H, TALDOR, TALH; transaldolase 1 (EC:2.2.1.2); K00616 transaldolase [EC:2.2.1.2] (A)                                                                                                   |
| K00950 | 0.023% | HC  | -0.0050% | 0.010 | 0.4 | DHPS, PPPK; dihydropteroate synthetase (EC:2.5.1.15); K00796 dihydropteroate synthase [EC:2.5.1.15] K00950 2-amino-4-hydroxy-6-hydroxymethylidihydropteridine diphosphokinase [EC:2.7.6.3] (A)          |
| K07560 | 0.071% | HC  | -0.0037% | 0.005 | 0.4 | DTD1, C20orf88, DUEB, HARS2, bA379J5.3, bA555E18.1, pqn-68; D-tyrosyl-tRNA deacylase 1 homolog ( <i>S. cerevisiae</i> ) (EC:6.1.1.21); K07560 D-tyrosyl-tRNA(Tyr) deacylase [EC:3.1.-.-] (A)            |
| K07567 | 0.075% | HC  | -0.0015% | 0.009 | 0.4 | endoribonuclease L-PSP, putative; K07567 TdcF protein (A)                                                                                                                                               |
| K01752 | 0.122% | RBD | 0.0076%  | 0.007 | 0.4 | SDS, SDH; serine dehydratase (EC:4.3.1.17 4.3.1.19); K01752 L-serine dehydratase [EC:4.3.1.17] (A)                                                                                                      |
| K00831 | 0.078% | HC  | -0.0021% | 0.006 | 0.4 | PSAT1, EPIP, PSA, PSAT; phosphoserine aminotransferase 1 (EC:2.6.1.52); K00831 phosphoserine aminotransferase [EC:2.6.1.52] (A)                                                                         |
| K03786 | 0.047% | HC  | -0.0084% | 0.009 | 0.4 | DEHA2F23584p; K03786 3-dehydroquinone dehydratase II [EC:4.2.1.10] (A)                                                                                                                                  |
| K01953 | 0.105% | RBD | 0.0049%  | 0.003 | 0.3 | ASNS, TS11; asparagine synthetase (glutamine-hydrolyzing) (EC:6.3.5.4); K01953 asparagine synthase (glutamine-hydrolyzing) [EC:6.3.5.4] (A)                                                             |
| K02687 | 0.077% | HC  | -0.0030% | 0.004 | 0.4 | prmA; methyltransferase for 50S ribosomal subunit protein L11 (EC:2.1.1.-); K02687 ribosomal protein L11 methyltransferase [EC:2.1.1.-] (A)                                                             |
| K03978 | 0.080% | HC  | -0.0025% | 0.004 | 0.3 | GTP-binding protein At2g22870-like; K03978 GTP-binding protein (A)                                                                                                                                      |
| K03570 | 0.078% | HC  | -0.0024% | 0.001 | 0.3 | mreC; cell wall structural complex MreBCD transmembrane component MreC; K03570 rod shape-determining protein MreC (A)                                                                                   |
| K02970 | 0.079% | HC  | -0.0025% | 0.009 | 0.4 | rpsU; 30S ribosomal subunit protein S21; K02970 small subunit ribosomal protein S21 (A)                                                                                                                 |
| K01719 | 0.013% | HC  | -0.0052% | 0.006 | 0.4 | UROS, UROIIS; uroporphyrinogen III synthase (EC:4.2.1.75); K01719 uroporphyrinogen-III synthase [EC:4.2.1.75] (A)                                                                                       |
| K02837 | 0.064% | HC  | -0.0055% | 0.003 | 0.3 | prfC; peptide chain release factor RF-3; K02837 peptide chain release factor 3 (A)                                                                                                                      |
| K07636 | 0.077% | HC  | -0.0005% | 0.009 | 0.4 | phoR; sensory histidine kinase in two-component regulatory system with PhoB (EC:2.7.3.-); K07636 two-component system, OmpR family, phosphate regulon sensor histidine kinase PhoR [EC:2.7.13.3] (A)    |
| K06950 | 0.129% | HC  | -0.0104% | 0.006 | 0.4 | Metal-dependent phosphohydrolase; K06950 uncharacterized protein (A)                                                                                                                                    |
| K09760 | 0.042% | HC  | -0.0060% | 0.008 | 0.4 | rnuC; predicted recombination limiting protein; K09760 DNA recombination protein RnuC (A)                                                                                                               |
| K01187 | 0.099% | RBD | 0.0098%  | 0.008 | 0.4 | sucrase-isomaltase, intestinal-like; K01187 alpha-glucosidase [EC:3.2.1.20] (A)                                                                                                                         |
| K03699 | 0.047% | RBD | 0.0067%  | 0.004 | 0.3 | tlyC; hemolysin; K03699 putative hemolysin (A)                                                                                                                                                          |
| K05366 | 0.079% | HC  | -0.0082% | 0.000 | 0.3 | mrcA; fused penicillin-binding protein 1a: murein transglycosylase/murein transpeptidase (EC:2.4.2.- 3.4.-.-); K05366 penicillin-binding protein 1A [EC:2.4.1.- 3.4.-.-] (A)                            |
| K01433 | 0.006% | HC  | -0.0011% | 0.003 | 0.3 | Formyl transferase; K01433 formyltetrahydrofolate deformylase [EC:3.5.1.10] (A)                                                                                                                         |
| K07053 | 0.105% | RBD | 0.0053%  | 0.003 | 0.3 | Polymerase/histidinol phosphatase-like protein; K07053 (A)                                                                                                                                              |
| K03547 | 0.045% | RBD | 0.0081%  | 0.006 | 0.4 | sbcD; exonuclease, dsDNA, ATP-dependent; K03547 exonuclease SbcD (A)                                                                                                                                    |
| K03294 | 0.025% | RBD | 0.0036%  | 0.005 | 0.4 | uncharacterized LOC100776671; K03294 basic amino acid/polyamine antiporter, APA family (A)                                                                                                              |
| K03581 | 0.045% | RBD | 0.0040%  | 0.008 | 0.4 | recD; exonuclease V (RecBCD complex), alpha chain (EC:3.1.11.5); K03581 exodeoxyribonuclease V alpha subunit [EC:3.1.11.5] (A)                                                                          |
| K06890 | 0.034% | HC  | -0.0084% | 0.004 | 0.4 | GRINA, HNRGW, LFG1, NMDARA1, TMBIM3; glutamate receptor, ionotropic, N-methyl D-aspartate-associated protein 1 (glutamate binding); K06890 (A)                                                          |
| K01259 | 0.004% | HC  | -0.0013% | 0.002 | 0.3 | PIP; proline iminopeptidase; K01259 proline iminopeptidase [EC:3.4.11.5] (A)                                                                                                                            |
| K09125 | 0.011% | HC  | -0.0053% | 0.005 | 0.4 | yhhQ; inner membrane protein, DUF165 family; K09125 hypothetical protein (A)                                                                                                                            |
| K07054 | 0.004% | HC  | -0.0027% | 0.000 | 0.3 | ypfJ; conserved protein; K07054 (A)                                                                                                                                                                     |
| K05794 | 0.003% | HC  | -0.0006% | 0.000 | 0.3 | terC; phage inhibition, colicin resistance and tellurite resistance protein; K05794 tellurite resistance protein TerC (A)                                                                               |
| K03316 | 0.004% | HC  | -0.0006% | 0.004 | 0.4 | CPA1 family transporter: sodium ion/proton; K03316 monovalent cation:H+ antiporter, CPA1 family (A)                                                                                                     |
| K01151 | 0.047% | RBD | 0.0043%  | 0.001 | 0.3 | DNA LYASE/ENDONUCLEASE 4; K01151 deoxyribonuclease IV [EC:3.1.21.2] (A)                                                                                                                                 |
| K00782 | 0.009% | HC  | -0.0036% | 0.006 | 0.4 | ykgG; predicted transporter; K00782 hypothetical protein (A)                                                                                                                                            |
| K07727 | 0.042% | RBD | 0.0034%  | 0.007 | 0.4 | XRE family transcriptional regulator; K07727 putative transcriptional regulator (A)                                                                                                                     |
| K05521 | 0.016% | HC  | -0.0071% | 0.003 | 0.3 | yegU; predicted hydrolase; K05521 ADP-ribosylglycohydrolase [EC:3.2.-.-] (A)                                                                                                                            |
| K03549 | 0.005% | HC  | -0.0007% | 0.005 | 0.4 | KT2; potassium transporter 2; K03549 KUP system potassium uptake protein (A)                                                                                                                            |
| K08281 | 0.005% | HC  | -0.0040% | 0.000 | 0.3 | pncA; nicotinamidase/pyrazinamidase (EC:3.5.1.19 3.5.1.-); K08281 nicotinamidase/pyrazinamidase [EC:3.5.1.19 3.5.1.-] (A)                                                                               |
| K03929 | 0.012% | HC  | -0.0009% | 0.008 | 0.4 | putative esterase; K03929 para-nitrobenzyl esterase [EC:3.1.1.-] (A)                                                                                                                                    |
| K01654 | 0.022% | RBD | 0.0029%  | 0.007 | 0.4 | neuB; sialic acid synthase NeuB (EC:1.2.4.1); K01654 N-acetylneuraminase synthase [EC:2.5.1.56] (A)                                                                                                     |
| K06177 | 0.010% | HC  | -0.0053% | 0.003 | 0.3 | rluA; pseudouridine synthase for 23S rRNA (position 746) and tRNAphe(position 32) (EC:4.2.1.70); K06177 tRNA pseudouridine32 synthase / 23S rRNA pseudouridine746 synthase [EC:5.4.99.28 5.4.99.29] (A) |
| K07259 | 0.012% | HC  | -0.0065% | 0.001 | 0.3 | dacB; D-alanyl-D-alanine carboxypeptidase (EC:3.4.16.4); K07259 D-alanyl-D-alanine carboxypeptidase / D-alanyl-D-alanine-endopeptidase (penicillin-binding protein 4) [EC:3.4.16.4 3.4.21.-] (A)        |
| K08963 | 0.028% | RBD | 0.0050%  | 0.008 | 0.4 | MRI1, MTNA, Ypr118w; methylthioribose-1-phosphate isomerase homolog ( <i>S. cerevisiae</i> ) (EC:5.3.1.23); K08963 methylthioribose-1-phosphate isomerase [EC:5.3.1.23] (A)                             |
| K04651 | 0.036% | RBD | 0.0037%  | 0.004 | 0.4 | hypA; protein involved in nickel insertion into hydrogenases 3; K04651 hydrogenase nickel incorporation protein HypA/HybF (A)                                                                           |
| K04652 | 0.034% | RBD | 0.0038%  | 0.003 | 0.3 | hypB; GTP hydrolase involved in nickel liganding into hydrogenases; K04652 hydrogenase nickel incorporation protein HypB (A)                                                                            |
| K01417 | 0.009% | RBD | 0.0023%  | 0.007 | 0.4 | ATP-dependent Zn protease FtsH2; K01417 [EC:3.4.24.-] (A)                                                                                                                                               |

|        |        |     |          |       |     |                                                                                                                                                             |
|--------|--------|-----|----------|-------|-----|-------------------------------------------------------------------------------------------------------------------------------------------------------------|
|        |        |     |          |       |     | HDDC2, C6orf74, NS5ATP2, dJ16705.2; HD domain containing 2; K07023 putative hydrolases of HD superfamily (A)                                                |
| K07023 | 0.036% | RBD | 0.0039%  | 0.010 | 0.4 |                                                                                                                                                             |
| K07185 | 0.013% | RBD | 0.0011%  | 0.003 | 0.3 | TspO/MBR family protein; K07185 tryptophan-rich sensory protein (A)                                                                                         |
|        |        |     |          |       |     | cbpA; curved DNA-binding protein, DnaJ homologue that functions as a co-chaperone of DnaK; K05516 curved DNA-binding protein (A)                            |
| K05516 | 0.011% | HC  | -0.0059% | 0.004 | 0.4 |                                                                                                                                                             |
|        |        |     |          |       |     | CMAS, CSS; cytidine monophosphate N-acetylneuraminic acid synthetase (EC:2.7.7.43); K00983 N-acylneuraminic acid cytidyltransferase [EC:2.7.7.43] (A)       |
| K00983 | 0.023% | RBD | 0.0033%  | 0.007 | 0.4 |                                                                                                                                                             |
| K10536 | 0.023% | RBD | 0.0047%  | 0.008 | 0.4 | EMB1873; agmatine deiminase; K10536 agmatine deiminase [EC:3.5.3.12] (A)                                                                                    |
|        |        |     |          |       |     | DNA mismatch repair protein MutS2; K07456 DNA mismatch repair protein MutS2 (A)                                                                             |
| K07456 | 0.075% | HC  | -0.0017% | 0.009 | 0.4 |                                                                                                                                                             |
|        |        |     |          |       |     | putative toxin-plasmid maintenance system killer protein; K07334 proteic killer suppression protein (A)                                                     |
| K07334 | 0.006% | HC  | -0.0017% | 0.001 | 0.3 |                                                                                                                                                             |
|        |        |     |          |       |     | ATOX1, ATX1, HAH1; ATX1 antioxidant protein 1 homolog (yeast) (EC:6.2.1.2); K07213 copper chaperone (A)                                                     |
| K07213 | 0.012% | HC  | -0.0047% | 0.008 | 0.4 |                                                                                                                                                             |
|        |        |     |          |       |     | PPOX, PPO, V290M, VP; protoporphyrinogen oxidase (EC:1.3.3.4); K00231 oxygen-dependent protoporphyrinogen oxidase [EC:1.3.3.4] (A)                          |
| K00231 | 0.005% | HC  | -0.0033% | 0.002 | 0.3 |                                                                                                                                                             |
|        |        |     |          |       |     | mgsA; methylglyoxal synthase (EC:4.2.3.3); K01734 methylglyoxal synthase [EC:4.2.3.3] (A)                                                                   |
| K01734 | 0.099% | RBD | 0.0102%  | 0.004 | 0.4 |                                                                                                                                                             |
|        |        |     |          |       |     | cbiM; cobalamin biosynthesis protein CbiM; K02007 cobalt/nickel transport system permease protein (A)                                                       |
| K02007 | 0.029% | RBD | 0.0027%  | 0.001 | 0.3 |                                                                                                                                                             |
|        |        |     |          |       |     | ABC transporter ATP-binding protein; K02006 cobalt/nickel transport system ATP-binding protein (A)                                                          |
| K02006 | 0.029% | RBD | 0.0029%  | 0.001 | 0.3 |                                                                                                                                                             |
|        |        |     |          |       |     | ISYNA1, INO1, INOS, IPS, IPS_1, IPS-1; inositol-3-phosphate synthase 1 (EC:5.5.1.4); K01858 myo-inositol-1-phosphate synthase [EC:5.5.1.4] (A)              |
| K01858 | 0.006% | HC  | -0.0007% | 0.002 | 0.3 |                                                                                                                                                             |
| K01442 | 0.059% | RBD | 0.0099%  | 0.006 | 0.4 | choloylglycine hydrolase; K01442 choloylglycine hydrolase [EC:3.5.1.24] (A)                                                                                 |
|        |        |     |          |       |     | ahpF; alkyl hydroperoxide reductase, F52a subunit, FAD/NAD(P)-binding (EC:1.11.1.15); K03387 alkyl hydroperoxide reductase subunit F [EC:1.6.4.-] (A)       |
| K03387 | 0.012% | HC  | -0.0033% | 0.008 | 0.4 |                                                                                                                                                             |
|        |        |     |          |       |     | ompA; outer membrane protein A (3a;II*;G;d); K03286 OmpA-OmpF porin, OOP family (A)                                                                         |
| K03286 | 0.005% | HC  | -0.0009% | 0.010 | 0.4 |                                                                                                                                                             |
|        |        |     |          |       |     | rfaF; ADP-heptose:LPS heptosyltransferase II (EC:2.-.-.-); K02843 heptosyltransferase II [EC:2.4.-.-] (A)                                                   |
| K02843 | 0.005% | HC  | -0.0023% | 0.006 | 0.4 |                                                                                                                                                             |
|        |        |     |          |       |     | asnC; DNA-binding transcriptional dual regulator; K03718 Lrp/AsnC family transcriptional regulator, regulator for asnA, asnC and gidA (A)                   |
| K03718 | 0.019% | HC  | -0.0016% | 0.007 | 0.4 |                                                                                                                                                             |
| K08987 | 0.002% | HC  | 0.0040%  | 0.002 | 0.3 | integral membrane protein; K08987 putative membrane protein (A)                                                                                             |
| K01552 | 0.013% | RBD | 0.0022%  | 0.007 | 0.4 | PfATPase7; P-type ATPase, putative (EC:3.6.3.-); K01552 [EC:3.6.3.-] (A)                                                                                    |
|        |        |     |          |       |     | ihfA; integration host factor (IHF), DNA-binding protein, alpha subunit; K04764 integration host factor subunit alpha (A)                                   |
| K04764 | 0.004% | HC  | -0.0033% | 0.001 | 0.3 |                                                                                                                                                             |
| K06973 | 0.049% | RBD | 0.0091%  | 0.002 | 0.3 | peptidase membrane zinc metallopeptidase; K06973 (A)                                                                                                        |
| K08974 | 0.036% | RBD | 0.0077%  | 0.006 | 0.4 | membrane protein; K08974 putative membrane protein (A)                                                                                                      |
|        |        |     |          |       |     | glycine cleavage system protein P; K00282 glycine dehydrogenase subunit 1 [EC:1.4.4.2] (A)                                                                  |
| K00282 | 0.011% | HC  | -0.0013% | 0.006 | 0.4 |                                                                                                                                                             |
|        |        |     |          |       |     | glycine cleavage system protein P; K00283 glycine dehydrogenase subunit 2 [EC:1.4.4.2] (A)                                                                  |
| K00283 | 0.011% | HC  | -0.0013% | 0.006 | 0.4 |                                                                                                                                                             |
|        |        |     |          |       |     | fes; enterobactin/ferric enterobactin esterase; K07214 enterochelin esterase and related enzymes (A)                                                        |
| K07214 | 0.007% | HC  | -0.0001% | 0.006 | 0.4 |                                                                                                                                                             |
|        |        |     |          |       |     | entC; isochorismate synthase 1 (EC:5.4.4.2); K02361 isochorismate synthase [EC:5.4.4.2] (A)                                                                 |
| K02361 | 0.009% | HC  | -0.0005% | 0.003 | 0.3 |                                                                                                                                                             |
|        |        |     |          |       |     | chlorohydrolase family protein; K12960 5-methylthioadenosine/S-adenosylhomocysteine deaminase [EC:3.5.4.31 3.5.4.28] (A)                                    |
| K12960 | 0.029% | RBD | 0.0038%  | 0.009 | 0.4 |                                                                                                                                                             |
| K07273 | 0.012% | HC  | -0.0003% | 0.001 | 0.3 | yegX; predicted hydrolase; K07273 lysozyme (A)                                                                                                              |
|        |        |     |          |       |     | macrolide-efflux protein; K08217 MFS transporter, DHA3 family, macrolide efflux protein (A)                                                                 |
| K08217 | 0.037% | RBD | 0.0035%  | 0.004 | 0.3 |                                                                                                                                                             |
|        |        |     |          |       |     | djIA; DnaJ-like protein, membrane anchored; K05801 DnaJ like chaperone protein (A)                                                                          |
| K05801 | 0.010% | HC  | -0.0023% | 0.003 | 0.3 |                                                                                                                                                             |
| K07284 | 0.011% | RBD | 0.0020%  | 0.004 | 0.4 | LPXTG-site transpeptidase; K07284 sortase A [EC:3.4.22.70] (A)                                                                                              |
| K07192 | 0.018% | RBD | 0.0020%  | 0.009 | 0.4 | FLOT1; flotillin 1; K07192 flotillin (A)                                                                                                                    |
| K07454 | 0.003% | HC  | -0.0028% | 0.001 | 0.3 | HNH nuclease; K07454 putative restriction endonuclease (A)                                                                                                  |
|        |        |     |          |       |     | DPP4, ADABP, ADCP2, CD26, DPPIV, TP103; dipeptidyl-peptidase 4 (EC:3.4.14.5); K01278 dipeptidyl-peptidase 4 [EC:3.4.14.5] (A)                               |
| K01278 | 0.019% | HC  | -0.0066% | 0.004 | 0.3 |                                                                                                                                                             |
| K09702 | 0.022% | RBD | 0.0050%  | 0.007 | 0.4 | REE1; Ree1p; K09702 hypothetical protein (A)                                                                                                                |
| K01185 | 0.003% | HC  | -0.0063% | 0.001 | 0.3 | LYZL2; lysozyme-like 2 (EC:3.2.1.17); K01185 lysozyme [EC:3.2.1.17] (A)                                                                                     |
|        |        |     |          |       |     | FBP11-1; peptidyl-prolyl cis-trans isomerase, FKBP-type; K03773 FKBP-type peptidyl-prolyl cis-trans isomerase FkIB [EC:5.2.1.8] (A)                         |
| K03773 | 0.012% | HC  | -0.0022% | 0.008 | 0.4 |                                                                                                                                                             |
|        |        |     |          |       |     | GntR family transcriptional regulator; K07979 GntR family transcriptional regulator (A)                                                                     |
| K07979 | 0.032% | RBD | 0.0042%  | 0.009 | 0.4 |                                                                                                                                                             |
|        |        |     |          |       |     | NosD, nitrous oxidase accessory protein; K07218 nitrous oxidase accessory protein (A)                                                                       |
| K07218 | 0.001% | HC  | 0.0016%  | 0.000 | 0.3 |                                                                                                                                                             |
|        |        |     |          |       |     | xanthine phosphoribosyltransferase (EC:2.4.2.22); K03816 xanthine phosphoribosyltransferase [EC:2.4.2.22] (A)                                               |
| K03816 | 0.060% | HC  | -0.0028% | 0.006 | 0.4 |                                                                                                                                                             |
| K06990 | 0.002% | HC  | 0.0020%  | 0.003 | 0.3 | MEMO1, C2orf4, MEMO, NS5ATP7; mediator of cell motility 1; K06990 (A)                                                                                       |
|        |        |     |          |       |     | nitrous-oxide reductase (EC:1.7.99.6); K00376 nitrous-oxide reductase [EC:1.7.2.4] (A)                                                                      |
| K00376 | 0.001% | HC  | 0.0016%  | 0.000 | 0.3 |                                                                                                                                                             |
| K13626 | 0.022% | RBD | 0.0026%  | 0.010 | 0.4 | flagellar assembly protein FliW; K13626 flagellar assembly factor FliW (A)                                                                                  |
|        |        |     |          |       |     | peptidoglycan glycosyltransferase (EC:2.4.1.129); K05364 peptidoglycan glycosyltransferase [EC:2.4.1.129] (A)                                               |
| K05364 | 0.012% | RBD | 0.0005%  | 0.005 | 0.4 |                                                                                                                                                             |
| K16922 | 0.002% | HC  | -0.0047% | 0.000 | 0.3 | putative peptide zinc metalloprotease protein                                                                                                               |
| K08984 | 0.002% | HC  | 0.0020%  | 0.000 | 0.3 | yjdB; conserved inner membrane protein; K08984 putative membrane protein (A)                                                                                |
|        |        |     |          |       |     | cytR; DNA-binding transcriptional dual regulator; K05499 LacI family transcriptional regulator, repressor for deo operon, udp, cdd, tsx, nupC, and nupG (A) |
| K05499 | 0.001% | HC  | -0.0044% | 0.001 | 0.3 |                                                                                                                                                             |
| K07000 | 0.003% | HC  | -0.0014% | 0.006 | 0.4 | ycfP; conserved protein; K07000 (A)                                                                                                                         |
|        |        |     |          |       |     | nrFA; nitrite reductase, formate-dependent, cytochrome; K03385 cytochrome c-552 [EC:1.7.2.2] (A)                                                            |
| K03385 | 0.008% | HC  | -0.0051% | 0.008 | 0.4 |                                                                                                                                                             |



|        |        |     |          |       |     |                                                                                                                                                                                                                                      |
|--------|--------|-----|----------|-------|-----|--------------------------------------------------------------------------------------------------------------------------------------------------------------------------------------------------------------------------------------|
| K00096 | 0.025% | RBD | 0.0020%  | 0.007 | 0.4 | glycerol dehydrogenase; K00096 glycerol-1-phosphate dehydrogenase [NAD(P)] [EC:1.1.1.261] (A)                                                                                                                                        |
| K00690 | 0.013% | RBD | 0.0007%  | 0.004 | 0.3 | ycjM; predicted glucosyltransferase; K00690 sucrose phosphorylase [EC:2.4.1.7] (A)                                                                                                                                                   |
| K17318 | 0.137% | RBD | 0.0217%  | 0.008 | 0.4 | putative aldouronate transport system substrate-binding protein                                                                                                                                                                      |
| K17319 | 0.101% | RBD | 0.0146%  | 0.007 | 0.4 | putative aldouronate transport system permease protein                                                                                                                                                                               |
| K17320 | 0.101% | RBD | 0.0146%  | 0.007 | 0.4 | putative aldouronate transport system permease protein                                                                                                                                                                               |
| K09155 | 0.013% | HC  | -0.0047% | 0.005 | 0.4 | PAS/PAC sensor protein; K09155 hypothetical protein (A)                                                                                                                                                                              |
| K07079 | 0.068% | RBD | 0.0085%  | 0.006 | 0.4 | aldo/keto reductase; K07079 (A)                                                                                                                                                                                                      |
| K01713 | 0.002% | HC  | 0.0023%  | 0.002 | 0.3 | cyclohexadienyl dehydratase; K01713 cyclohexadienyl dehydratase [EC:4.2.1.51 4.2.1.91] (A)                                                                                                                                           |
| K02385 | 0.020% | RBD | 0.0025%  | 0.007 | 0.4 | flbD; flagellar protein FlbD; K02385 flagellar protein FlbD (A)                                                                                                                                                                      |
| K08364 | 0.001% | HC  | 0.0014%  | 0.002 | 0.3 | mercuric transport protein periplasmic component precursor MerP; K08364 periplasmic mercuric ion binding protein (A)                                                                                                                 |
| K09474 | 0.006% | HC  | -0.0028% | 0.001 | 0.3 | acid phosphatase; K09474 acid phosphatase (class A) [EC:3.1.3.2] (A)                                                                                                                                                                 |
| K15876 | 0.006% | HC  | -0.0052% | 0.004 | 0.3 | NRFH; small subunit of cytochrome c nitrite reductase; K15876 cytochrome c-type protein (A)                                                                                                                                          |
| K03716 | 0.014% | RBD | 0.0001%  | 0.010 | 0.4 | DNA repair photolyase; K03716 spore photoproduct lyase [EC:4.1.99.14] (A)                                                                                                                                                            |
| K05792 | 0.001% | HC  | -0.0045% | 0.002 | 0.3 | terA; phage inhibition, colicin resistance and tellurite resistance protein; K05792 tellurite resistance protein TerA (A)                                                                                                            |
| K05791 | 0.001% | HC  | 0.0014%  | 0.001 | 0.3 | terZ; phage inhibition, colicin resistance and tellurite resistance protein; K05791 tellurium resistance protein TerZ (A)                                                                                                            |
| K07791 | 0.006% | HC  | -0.0027% | 0.008 | 0.4 | dcuA; C4-dicarboxylate antiporter; K07791 anaerobic C4-dicarboxylate transporter DcuA (A)                                                                                                                                            |
| K07792 | 0.003% | HC  | -0.0032% | 0.008 | 0.4 | dcuB; C4-dicarboxylate transporter, anaerobic; DcuS co-sensor; K07792 anaerobic C4 dicarboxylate transporter DcuB (A)                                                                                                                |
| K00113 | 0.002% | HC  | 0.0023%  | 0.001 | 0.3 | glpC; anaerobic sn-glycerol-3-phosphate dehydrogenase, C subunit, 4Fe-4S iron-sulfur cluster; K00113 glycerol-3-phosphate dehydrogenase subunit C [EC:1.1.5.3] (A)                                                                   |
| K00895 | 0.008% | HC  | -0.0007% | 0.004 | 0.3 | pyrophosphate--fructose-6-phosphate 1-phosphotransferase; K00895 glpB; sn-glycerol-3-phosphate dehydrogenase (anaerobic), membrane anchor subunit (EC:1.1.5.3); K00112 glycerol-3-phosphate dehydrogenase subunit B [EC:1.1.5.3] (A) |
| K00112 | 0.002% | HC  | 0.0023%  | 0.001 | 0.3 | cynR; transcriptional activator of cyn operon; autorepressor; K11921 LysR family transcriptional regulator (A)                                                                                                                       |
| K11921 | 0.003% | HC  | -0.0037% | 0.003 | 0.3 | yejM; predicted hydrolase, inner membrane; K07014 (A)                                                                                                                                                                                |
| K07014 | 0.002% | HC  | -0.0031% | 0.001 | 0.3 | hypothetical protein; K09805 hypothetical protein (A)                                                                                                                                                                                |
| K09805 | 0.002% | HC  | -0.0048% | 0.000 | 0.3 | yesN; two-component response regulator YesM; K07720 two-component system, response regulator YesN (A)                                                                                                                                |
| K07720 | 0.188% | RBD | 0.0212%  | 0.008 | 0.4 | yceM; predicted oxidoreductase with NAD(P)-binding Rossmann-fold domain; K03810 virulence factor (A)                                                                                                                                 |
| K03810 | 0.001% | HC  | -0.0043% | 0.001 | 0.3 | yesM; two-component sensor histidine kinase YesN; K07718 two-component system, sensor histidine kinase YesM [EC:2.7.13.3] (A)                                                                                                        |
| K07718 | 0.186% | RBD | 0.0218%  | 0.008 | 0.4 | major facilitator superfamily protein; K06610 MFS transporter, SP family, inositol transporter (A)                                                                                                                                   |
| K06610 | 0.001% | HC  | -0.0044% | 0.002 | 0.3 | Thiol-activated cytolysin; K11031 thiol-activated cytolysin (A)                                                                                                                                                                      |
| K11031 | 0.002% | HC  | 0.0023%  | 0.006 | 0.4 | spmB; spore maturation protein B; K06374 spore maturation protein B (A)                                                                                                                                                              |
| K06374 | 0.023% | RBD | 0.0026%  | 0.009 | 0.4 | spore maturation protein A; K06373 spore maturation protein A (A)                                                                                                                                                                    |
| K06373 | 0.029% | RBD | 0.0047%  | 0.009 | 0.4 | agp; glucose-1-phosphatase/inositol phosphatase (EC:3.1.3.10); K01085 glucose-1-phosphatase [EC:3.1.3.10] (A)                                                                                                                        |
| K01085 | 0.003% | HC  | -0.0044% | 0.001 | 0.3 | methylaspartate ammonia-lyase C-terminal domain protein; K04835 methylaspartate ammonia-lyase [EC:4.3.1.2] (A)                                                                                                                       |
| K04835 | 0.001% | HC  | 0.0017%  | 0.001 | 0.3 | arnE; undecaprenyl phosphate-alpha-L-ara4N exporter; flippase ArnEF subunit; K12962 undecaprenyl phosphate-alpha-L-ara4N flippase subunit ArnE (A)                                                                                   |
| K12962 | 0.001% | HC  | -0.0044% | 0.003 | 0.3 | PANK1, PANK; pantothenate kinase 1 (EC:2.7.1.33); K09680 type II pantothenate kinase [EC:2.7.1.33] (A)                                                                                                                               |
| K09680 | 0.013% | HC  | -0.0015% | 0.004 | 0.3 | THI1; thiazole biosynthetic enzyme; K03146 thiamine biosynthetic enzyme (A)                                                                                                                                                          |
| K03146 | 0.002% | HC  | -0.0029% | 0.003 | 0.3 | NADH:flavin oxidoreductase; K10797 2-enoate reductase [EC:1.3.1.31] (A)                                                                                                                                                              |
| K10797 | 0.010% | RBD | 0.0015%  | 0.008 | 0.4 | mprA; DNA-binding transcriptional repressor of microcin B17 synthesis and multidrug efflux; K15974 MarR family transcriptional regulator, negative regulator of the multidrug operon emrRAB (A)                                      |
| K15974 | 0.001% | HC  | 0.0014%  | 0.003 | 0.3 | similar to exo-beta-D-glucosaminidase; K15855 exo-1,4-beta-D-glucosaminidase [EC:3.2.1.165] (A)                                                                                                                                      |
| K15855 | 0.001% | HC  | -0.0044% | 0.001 | 0.3 | nupG; nucleoside transporter; K03289 MFS transporter, NHS family, nucleoside permease (A)                                                                                                                                            |
| K03289 | 0.005% | HC  | -0.0026% | 0.001 | 0.3 |                                                                                                                                                                                                                                      |



| ID               | comment                 | Sample ID   | extraction batch | sequencing run | sequencing coordinate | fastq Files                                                                                                                                                                     | Forward Primer    | Reverse Primer       |
|------------------|-------------------------|-------------|------------------|----------------|-----------------------|---------------------------------------------------------------------------------------------------------------------------------------------------------------------------------|-------------------|----------------------|
| none             | mock-extraction control | exCAD0.f    | Al.f             | P1             | A04                   | A04-exCFAD-166_514_L001_R1_001.fastq;A04-exCFAD-166_514_L001_R2_001.fastq                                                                                                       | GTGBCACMGCCGGGTAA | GACTACHVGGGTACTAATCC |
| none             | mock-extraction control | exCAD0.f    | Bl.f             | P1             | B04                   | B04-exCFBD-166_514_L001_R1_001.fastq;B04-exCFBD-166_514_L001_R2_001.fastq                                                                                                       | GTGBCACMGCCGGGTAA | GACTACHVGGGTACTAATCC |
| none             | mock-extraction control | exCAD0.f    | Al.f             | P1             | G08                   | G08-exCFAD-166_565_L001_R1_001.fastq;G08-exCFAD-166_565_L001_R2_001.fastq                                                                                                       | GTGBCACMGCCGGGTAA | GACTACHVGGGTACTAATCC |
| none             | mock-extraction control | exCB0C.f    | Bl.f             | P1             | H08                   | H08-exCFBD-166_573_L001_R1_001.fastq;H08-exCFBD-166_573_L001_R2_001.fastq                                                                                                       | GTGBCACMGCCGGGTAA | GACTACHVGGGTACTAATCC |
| none             | mock-extraction control | exCF1D.f    | E2.f             | P11            | A12                   | P11.A12-117-exCFE-166_512_L001_R1_001.fastq;P11.A12-117-exCFE-166_512_L001_R2_001.fastq;P11.B04-100-exCFE-166_516_L001_R1_001.fastq;P11.B04-100-exCFE-166_516_L001_R2_001.fastq | GTGBCACMGCCGGGTAA | GACTACHVGGGTACTAATCC |
| none             | mock-extraction control | exCF1D.f    | C2.f             | P11            | B04                   | P11.B08-ntc-166_521_L001_R1_001.fastq;P11.B08-ntc-166_521_L001_R2_001.fastq                                                                                                     | GTGBCACMGCCGGGTAA | GACTACHVGGGTACTAATCC |
| none             | mock-extraction control | exCF11.f    | NA               | P11            | B09                   | P11.B09-ntc-166_521_L001_R1_001.fastq;P11.B09-ntc-166_521_L001_R2_001.fastq                                                                                                     | GTGBCACMGCCGGGTAA | GACTACHVGGGTACTAATCC |
| none             | mock-extraction control | exCF1D.f    | B2.f             | P11            | C02                   | P11.C02-111-exCFB-166_526_L001_R1_001.fastq;P11.C02-111-exCFB-166_526_L001_R2_001.fastq                                                                                         | GTGBCACMGCCGGGTAA | GACTACHVGGGTACTAATCC |
| none             | mock-extraction control | exCB0.n     | Al.n             | P2             | A12                   | A12-eCA_S86_L001_R1_001.fastq;A12-eCA_S86_L001_R2_001.fastq                                                                                                                     | GTGBCACMGCCGGGTAA | GACTACHVGGGTACTAATCC |
| none             | mock-extraction control | exCB0.n     | Bl.n             | P2             | B12                   | B12-eCB_S98_L001_R1_001.fastq;B12-eCB_S98_L001_R2_001.fastq                                                                                                                     | GTGBCACMGCCGGGTAA | GACTACHVGGGTACTAATCC |
| none             | mock-extraction control | exCB0.n     | C1.n             | P2             | C12                   | C12-eCC_S110_L001_R1_001.fastq;C12-eCC_S110_L001_R2_001.fastq                                                                                                                   | GTGBCACMGCCGGGTAA | GACTACHVGGGTACTAATCC |
| none             | mock-extraction control | exCB0.n     | D1.n             | P2             | D12                   | D12-eCD_S122_L001_R1_001.fastq;D12-eCD_S122_L001_R2_001.fastq                                                                                                                   | GTGBCACMGCCGGGTAA | GACTACHVGGGTACTAATCC |
| none             | mock-extraction control | exCB0.n     | E1.n             | P2             | E12                   | E12-eCE_S134_L001_R1_001.fastq;E12-eCE_S134_L001_R2_001.fastq                                                                                                                   | GTGBCACMGCCGGGTAA | GACTACHVGGGTACTAATCC |
| none             | mock-extraction control | exCB0.n     | G1.n             | P2             | G10                   | G10-eCG_S156_L001_R1_001.fastq;G10-eCG_S156_L001_R2_001.fastq                                                                                                                   | GTGBCACMGCCGGGTAA | GACTACHVGGGTACTAATCC |
| none             | mock-extraction control | exCB0.n     | H2.n             | P3             | A12                   | N-112-eW1-166_512_L001_R1_001.fastq;N-112-eW1-166_512_L001_R2_001.fastq                                                                                                         | GTGBCACMGCCGGGTAA | GACTACHVGGGTACTAATCC |
| none             | mock-extraction control | exCB0.n     | O2.n             | P3             | B11                   | O-111-eW1-166_523_L001_R1_001.fastq;O-111-eW1-166_523_L001_R2_001.fastq                                                                                                         | GTGBCACMGCCGGGTAA | GACTACHVGGGTACTAATCC |
| none             | mock-extraction control | exCB0.n     | P2.n             | P3             | C10                   | P-110-eW1-166_534_L001_R1_001.fastq;P-110-eW1-166_534_L001_R2_001.fastq                                                                                                         | GTGBCACMGCCGGGTAA | GACTACHVGGGTACTAATCC |
| none             | mock-extraction control | exCB0.n     | Q2.n             | P3             | D09                   | Q-109-eW1-166_545_L001_R1_001.fastq;Q-109-eW1-166_545_L001_R2_001.fastq                                                                                                         | GTGBCACMGCCGGGTAA | GACTACHVGGGTACTAATCC |
| none             | mock-extraction control | exCB0.n     | R2.n             | P3             | E02                   | R-102-eW1-166_550_L001_R1_001.fastq;R-102-eW1-166_550_L001_R2_001.fastq                                                                                                         | GTGBCACMGCCGGGTAA | GACTACHVGGGTACTAATCC |
| none             | mock-extraction control | exCB0.n     | A2.n             | P4             | A01                   | A01-A-101_S1_L001_R1_001.fastq;A01-A-101_S1_L001_R2_001.fastq                                                                                                                   | GTGBCACMGCCGGGTAA | GACTACHVGGGTACTAATCC |
| none             | mock-extraction control | exCB0.n     | B2.n             | P4             | B12                   | B12-B-112_S24_L001_R1_001.fastq;B12-B-112_S24_L001_R2_001.fastq                                                                                                                 | GTGBCACMGCCGGGTAA | GACTACHVGGGTACTAATCC |
| none             | mock-extraction control | exCB0.n     | C2.n             | P4             | C11                   | C11-C-111_S35_L001_R1_001.fastq;C11-C-111_S35_L001_R2_001.fastq                                                                                                                 | GTGBCACMGCCGGGTAA | GACTACHVGGGTACTAATCC |
| none             | mock-extraction control | exCB0.n     | D2.n             | P4             | D10                   | D10-D-110_S46_L001_R1_001.fastq;D10-D-110_S46_L001_R2_001.fastq                                                                                                                 | GTGBCACMGCCGGGTAA | GACTACHVGGGTACTAATCC |
| none             | mock-extraction control | exCB0.n     | E2.n             | P4             | E09                   | E09-E-109_S57_L001_R1_001.fastq;E09-E-109_S57_L001_R2_001.fastq                                                                                                                 | GTGBCACMGCCGGGTAA | GACTACHVGGGTACTAATCC |
| none             | mock-extraction control | exCB0.n     | F2.n             | P4             | F08                   | F08-F-108_S68_L001_R1_001.fastq;F08-F-108_S68_L001_R2_001.fastq                                                                                                                 | GTGBCACMGCCGGGTAA | GACTACHVGGGTACTAATCC |
| none             | mock-extraction control | exCB0.n     | G2.n             | P4             | G07                   | G07-G-107_S79_L001_R1_001.fastq;G07-G-107_S79_L001_R2_001.fastq                                                                                                                 | GTGBCACMGCCGGGTAA | GACTACHVGGGTACTAATCC |
| none             | mock-extraction control | exCB0.n     | T2.n             | P5             | A04                   | T-104-P9-A04_S76_L001_R1_001.fastq;T-104-P9-A04_S76_L001_R2_001.fastq                                                                                                           | GTGBCACMGCCGGGTAA | GACTACHVGGGTACTAATCC |
| none             | mock-extraction control | exCB0.n     | I2.n             | P5             | B05                   | I-105-P5-B05_S17_L001_R1_001.fastq;I-105-P5-B05_S17_L001_R2_001.fastq                                                                                                           | GTGBCACMGCCGGGTAA | GACTACHVGGGTACTAATCC |
| none             | mock-extraction control | exCB0.n     | H2.n             | P5             | B06                   | H-106-P9-B06_S90_L001_R1_001.fastq;H-106-P9-B06_S90_L001_R2_001.fastq                                                                                                           | GTGBCACMGCCGGGTAA | GACTACHVGGGTACTAATCC |
| none             | mock-extraction control | exCB0.n     | K2.n             | P5             | C03                   | K-103-P5-C03_S27_L001_R1_001.fastq;K-103-P5-C03_S27_L001_R2_001.fastq                                                                                                           | GTGBCACMGCCGGGTAA | GACTACHVGGGTACTAATCC |
| none             | mock-extraction control | exCB0.n     | L2.n             | P5             | D02                   | L-102-P5-D02_S38_L001_R1_001.fastq;L-102-P5-D02_S38_L001_R2_001.fastq                                                                                                           | GTGBCACMGCCGGGTAA | GACTACHVGGGTACTAATCC |
| none             | mock-extraction control | exCB0.n     | M2.n             | P5             | E01                   | M-101-P5-E01_S49_L001_R1_001.fastq;M-101-P5-E01_S49_L001_R2_001.fastq                                                                                                           | GTGBCACMGCCGGGTAA | GACTACHVGGGTACTAATCC |
| none             | mock-extraction control | exCB0.n     | J2.n             | P7             | G04                   | P10-G04-J-104_S40_L001_R1_001.fastq;P10-G04-J-104_S40_L001_R2_001.fastq                                                                                                         | GTGBCACMGCCGGGTAA | GACTACHVGGGTACTAATCC |
| none             | mock-extraction control | exCB0.n     | L2.n             | P7             | A11                   | P7-A11-L-111_S26_L001_R1_001.fastq;P7-A11-L-111_S26_L001_R2_001.fastq                                                                                                           | GTGBCACMGCCGGGTAA | GACTACHVGGGTACTAATCC |
| none             | mock-extraction control | exCB0.n     | V2.n             | P7             | B06                   | P7-B06-V-106_S15_L001_R1_001.fastq;P7-B06-V-106_S15_L001_R2_001.fastq                                                                                                           | GTGBCACMGCCGGGTAA | GACTACHVGGGTACTAATCC |
| none             | mock-extraction control | exCAD1.f    | B2.f             | H03            | H03                   | P10-H03-FA-103-exCFA_S30_L001_R1_001.fastq;P10-H03-FA-103-exCFA_S30_L001_R2_001.fastq                                                                                           | GTGBCACMGCCGGGTAA | GACTACHVGGGTACTAATCC |
| none             | mock-extraction control | exCB0.f     | B2.f             | P12            | C05                   | C05_111_exCFB_185_GCGTAGTA-TGCGACTAG_L001_R1_001.fastq;C05_111_exCFB_185_GCGTAGTA-TGCGACTAG_L001_R2_001.fastq                                                                   | CGGTAATYTCAGCTCV  | CCGTAATHTHTYAAAT     |
| none             | mock-extraction control | exCB0.f     | C2.f             | P13            | B01                   | P13B01-102-exCFE_S49_L001_R1_001.fastq;P13B01-102-exCFE_S49_L001_R2_001.fastq                                                                                                   | CGGTAATYTCAGCTCV  | CCGTAATHTHTYAAAT     |
| none             | mock-extraction control | exCB0.f     | E2.f             | P12            | C07                   | C07_117_exCFE_185_TAGCTGCT-TGCGACTAG_L001_R1_001.fastq;C07_117_exCFE_185_TAGCTGCT-TGCGACTAG_L001_R2_001.fastq                                                                   | CGGTAATYTCAGCTCV  | CCGTAATHTHTYAAAT     |
| none             | nasal wash solution     | saline09    | Saline           | P2             | G11                   | G11-saline09_S157_L001_R1_001.fastq;G11-saline09_S157_L001_R2_001.fastq                                                                                                         | GTGBCACMGCCGGGTAA | GACTACHVGGGTACTAATCC |
| none             | no template control     | NTC-P1      | NA               | P1             | H09                   | H09-NTC-166_574_L001_R1_001.fastq;H09-NTC-166_574_L001_R2_001.fastq                                                                                                             | GTGBCACMGCCGGGTAA | GACTACHVGGGTACTAATCC |
| none             | no template control     | NTC-P2      | NA               | P2             | F02                   | F02-NTC_S136_L001_R1_001.fastq;F02-NTC_S136_L001_R2_001.fastq                                                                                                                   | GTGBCACMGCCGGGTAA | GACTACHVGGGTACTAATCC |
| none             | no template control     | NTC-P3      | NA               | P3             | F10                   | S-110-166_570_L001_R1_001.fastq;S-110-166_570_L001_R2_001.fastq                                                                                                                 | GTGBCACMGCCGGGTAA | GACTACHVGGGTACTAATCC |
| none             | reagent control         | elu-P2.n    | NA               | P2             | F07                   | F07-elu_S141_L001_R1_001.fastq;F07-elu_S141_L001_R2_001.fastq                                                                                                                   | GTGBCACMGCCGGGTAA | GACTACHVGGGTACTAATCC |
| none             | reagent control         | elu-P3-1.n  | NA               | P3             | D03                   | NTC-166_539_L001_R1_001.fastq;NTC-166_539_L001_R2_001.fastq                                                                                                                     | GTGBCACMGCCGGGTAA | GACTACHVGGGTACTAATCC |
| none             | reagent control         | elu-P3-2.n  | NA               | P3             | H01                   | NTC2-166_573_L001_R1_001.fastq;NTC2-166_573_L001_R2_001.fastq                                                                                                                   | GTGBCACMGCCGGGTAA | GACTACHVGGGTACTAATCC |
| none             | reagent control         | elu-P4-1.n  | NA               | P4             | E05                   | E05-E-105_S53_L001_R1_001.fastq;E05-E-105_S53_L001_R2_001.fastq                                                                                                                 | GTGBCACMGCCGGGTAA | GACTACHVGGGTACTAATCC |
| none             | reagent control         | elu-P4-2.n  | NA               | P4             | H01                   | H01-NTC_S85_L001_R1_001.fastq;H01-NTC_S85_L001_R2_001.fastq                                                                                                                     | GTGBCACMGCCGGGTAA | GACTACHVGGGTACTAATCC |
| none             | reagent control         | elu-P50.n   | NA               | P5             | C01                   | NTCo-P9-C01_S69_L001_R1_001.fastq;NTCo-P9-C01_S69_L001_R2_001.fastq                                                                                                             | GTGBCACMGCCGGGTAA | GACTACHVGGGTACTAATCC |
| none             | reagent control         | elu-P5n.n   | NA               | P5             | C02                   | NTCn-P9-C02_S70_L001_R1_001.fastq;NTCn-P9-C02_S70_L001_R2_001.fastq                                                                                                             | GTGBCACMGCCGGGTAA | GACTACHVGGGTACTAATCC |
| none             | reagent control         | elu-P7n.n   | NA               | P7             | G06                   | P10-G06-NTCn_S61_L001_R1_001.fastq;P10-G06-NTCn_S61_L001_R2_001.fastq                                                                                                           | GTGBCACMGCCGGGTAA | GACTACHVGGGTACTAATCC |
| none             | reagent control         | elu-P7-1.n  | NA               | P7             | C01                   | P7-C01-NTC_S4_L001_R1_001.fastq;P7-C01-NTC_S4_L001_R2_001.fastq                                                                                                                 | GTGBCACMGCCGGGTAA | GACTACHVGGGTACTAATCC |
| none             | reagent control         | elu-P13.f   | NA               | P13            | B06                   | P13B06-ntc_S54_L001_R1_001.fastq;P13B06-ntc_S54_L001_R2_001.fastq                                                                                                               | CGGTAATYTCAGCTCV  | CCGTAATHTHTYAAAT     |
| generous donor A | internal standard       | GDAD-P1     | GDA              | P1             | A09                   | A09-GDAD-166_59_L001_R1_001.fastq;A09-GDAD-166_59_L001_R2_001.fastq                                                                                                             | GTGBCACMGCCGGGTAA | GACTACHVGGGTACTAATCC |
| generous donor A | internal standard       | GDAD-2-P1   | GDA              | P1             | A10                   | A10-GDAD-166_510_L001_R1_001.fastq;A10-GDAD-166_510_L001_R2_001.fastq                                                                                                           | GTGBCACMGCCGGGTAA | GACTACHVGGGTACTAATCC |
| generous donor A | internal standard       | GDAD-02-P1  | GDA              | P1             | B10                   | B10-GDAD-03-166_530_L001_R1_001.fastq;B10-GDAD-03-166_530_L001_R2_001.fastq                                                                                                     | GTGBCACMGCCGGGTAA | GACTACHVGGGTACTAATCC |
| generous donor A | internal standard       | GDAD-02-P2  | GDA              | P1             | C10                   | C10-GDAD-01-166_530_L001_R1_001.fastq;C10-GDAD-01-166_530_L001_R2_001.fastq                                                                                                     | GTGBCACMGCCGGGTAA | GACTACHVGGGTACTAATCC |
| generous donor A | internal standard       | GDAD-02-P1  | GDA              | P1             | D10                   | D10-GDAD-001-166_540_L001_R1_001.fastq;D10-GDAD-001-166_540_L001_R2_001.fastq                                                                                                   | GTGBCACMGCCGGGTAA | GACTACHVGGGTACTAATCC |
| generous donor A | internal standard       | GDAD-1-P1   | GDA              | P11            | E03                   | P11.E03-GDA1-166_551_L001_R1_001.fastq;P11.E03-GDA1-166_551_L001_R2_001.fastq                                                                                                   | GTGBCACMGCCGGGTAA | GACTACHVGGGTACTAATCC |
| generous donor A | internal standard       | GDAD-2-P1   | GDA              | P11            | F03                   | P11.F03-GDA2-166_562_L001_R1_001.fastq;P11.F03-GDA2-166_562_L001_R2_001.fastq                                                                                                   | GTGBCACMGCCGGGTAA | GACTACHVGGGTACTAATCC |
| generous donor A | internal standard       | GDAD-2-P2   | GDA              | P2             | H09                   | H09-GD1_S165_L001_R1_001.fastq;H09-GD1_S165_L001_R2_001.fastq                                                                                                                   | GTGBCACMGCCGGGTAA | GACTACHVGGGTACTAATCC |
| generous donor A | internal standard       | GDAD-3-P3   | GDA              | P3             | H02                   | GDAD-3-166_574_L001_R1_001.fastq;GDAD-3-166_574_L001_R2_001.fastq                                                                                                               | GTGBCACMGCCGGGTAA | GACTACHVGGGTACTAATCC |
| generous donor A | internal standard       | exAD03-P3   | GDA              | P3             | H03                   | GDAD-03-166_575_L001_R1_001.fastq;GDAD-03-166_575_L001_R2_001.fastq                                                                                                             | GTGBCACMGCCGGGTAA | GACTACHVGGGTACTAATCC |
| generous donor A | internal standard       | GDAD-3-P4   | GDA              | P4             | H02                   | H02-GDAD-3_S86_L001_R1_001.fastq;H02-GDAD-3_S86_L001_R2_001.fastq                                                                                                               | GTGBCACMGCCGGGTAA | GACTACHVGGGTACTAATCC |
| generous donor A | internal standard       | GDAD-03-P4  | GDA              | P4             | H03                   | H03-GDAD-03_S87_L001_R1_001.fastq;H03-GDAD-03_S87_L001_R2_001.fastq                                                                                                             | GTGBCACMGCCGGGTAA | GACTACHVGGGTACTAATCC |
| generous donor A | internal standard       | GDAD-3-P10  | GDA              | P7             | G07                   | P10-G07-GDAD-3_S71_L001_R1_001.fastq;P10-G07-GDAD-3_S71_L001_R2_001.fastq                                                                                                       | GTGBCACMGCCGGGTAA | GACTACHVGGGTACTAATCC |
| generous donor A | internal standard       | GDAD-03-P10 | GDA              | P7             | G08                   | P10-G08-GDAD-03_S81_L001_R1_001.fastq;P10-G08-GDAD-03_S81_L001_R2_001.fastq                                                                                                     | GTGBCACMGCCGGGTAA | GACTACHVGGGTACTAATCC |
| generous donor A | internal standard       | GDAD-3-P7   | GDA              | P7             | C02                   | P7-C02-GDAD-3_S16_L001_R1_001.fastq;P7-C02-GDAD-3_S16_L001_R2_001.fastq                                                                                                         | GTGBCACMGCCGGGTAA | GACTACHVGGGTACTAATCC |
| generous donor A | internal standard       | GDAD-03-P7  | GDA              | P7             | C03                   | P7-C03-GDAD-03_S28_L001_R1_001.fastq;P7-C03-GDAD-03_S28_L001_R2_001.fastq                                                                                                       | GTGBCACMGCCGGGTAA | GACTACHVGGGTACTAATCC |
| generous donor A | internal standard       | GDAD-3-P10  | GDA              | P7             | H11                   | P10-H11-GDA1-GDA1_S31_L001_R1_001.fastq;P10-H11-GDA1-GDA1_S31_L001_R2_001.fastq                                                                                                 | GTGBCACMGCCGGGTAA | GACTACHVGGGTACTAATCC |
| generous donor A | internal standard       | GDAD-3-P10  | GDA              | P7             | H12                   | P10-H12-GDA2-GDA2_S42_L001_R1_001.fastq;P10-H12-GDA2-GDA2_S42_L001_R2_001.fastq                                                                                                 | GTGBCACMGCCGGGTAA | GACTACHVGGGTACTAATCC |
| generous donor A | internal standard       | GDAD-3-P9   | GDA              | P9             | C03                   | GDAD-3-P9-C03_S71_L001_R1_001.fastq;GDAD-3-P9-C03_S71_L001_R2_001.fastq                                                                                                         | GTGBCACMGCCGGGTAA | GACTACHVGGGTACTAATCC |
| generous donor A | internal standard       | GDAD-3-P9   | GDA              | P9             | C04                   | GDAD-03-P9-C04_S72_L001_R1_001.fastq;GDAD-03-P9-C04_S72_L001_R2_001.fastq                                                                                                       | GTGBCACMGCCGGGTAA | GACTACHVGGGTACTAATCC |
| generous donor A | internal standard       | GDAD-3-P12  | GDA              | P12            | F03                   | F03_GDA3_185_ACTCGCTA-CGCTAAGA_L001_R1_001.fastq;F03_GDA3_185_ACTCGCTA-CGCTAAGA_L001_R2_001.fastq                                                                               | CGGTAATYTCAGCTCV  | CCGTAATHTHTYAAAT     |
| generous donor A | internal standard       | GDAD-3-P13  | GDA              | P13            | F03                   | P13F03-GDA1_S79_L001_R1_001.fastq;P13F03-GDA1_S79_L001_R2_001.fastq                                                                                                             | CGGTAATYTCAGCTCV  | CCGTAATHTHTYAAAT     |
| generous donor A | internal standard       | GDAD-3-P12  | GDA              | E03            | E03                   | E03_GDA3_185_ACTCGCTA-CCTAGAGT_L001_R1_001.fastq;E03_GDA3_185_ACTCGCTA-CCTAGAGT_L001_R2_001.fastq                                                                               | CGGTAATYTCAGCTCV  | CCGTAATHTHTYAAAT     |
| generous donor A | internal standard       | GDAD-3-P13  | GDA              | E03            | E03                   | P13E03-GDA2_S73_L001_R1_001.fastq;P13E03-GDA2_S73_L001_R2_001.fastq                                                                                                             | CGGTAATYTCAGCTCV  | CCGTAATHTHTYAAAT     |
